1           **Predictive regulatory and metabolic network models for systems**  
2                                   **analysis of *Clostridioides difficile***

3  
4 Mario L. Arrieta-Ortiz<sup>1</sup>, Selva Rupa Christinal Immanuel<sup>1</sup>, Serdar Turkarslan<sup>1</sup>, Wei Ju  
5 Wu<sup>1</sup>, Brintha P. Girinathan<sup>2</sup>, Jay N. Worley<sup>2</sup>, Nicholas DiBenedetto<sup>2</sup>, Olga Soutourina<sup>3</sup>,  
6 Johann Peltier<sup>3</sup>, Bruno Dupuy<sup>4</sup>, Lynn Bry<sup>2</sup> and Nitin S. Baliga<sup>1,+</sup>

7  
8 1. Institute for Systems Biology, Seattle, WA, USA

9 2. Massachusetts Host-Microbiome Center, Dept. Pathology, Brigham & Women's  
10 Hospital, Harvard Medical School, Boston, MA , USA

11 3. Université Paris-Saclay, CEA, CNRS, Institute for Integrative Biology of the Cell (I2BC),  
12 91198, Gif-sur-Yvette, France

13 4. Laboratory of the Pathogenesis of Bacterial Anaerobes, Institut Pasteur, Université de  
14 Paris, UMR-CNRS2001, France

15 +corresponding author: [nitin.baliga@isbscience.org](mailto:nitin.baliga@isbscience.org)

16

17

18

## 19 **ABSTRACT**

20 Though *Clostridioides difficile* is among the most studied anaerobes, we know little about the  
21 systems level interplay of metabolism and regulation that underlies its ability to negotiate complex  
22 immune and commensal interactions while colonizing the human gut. We have compiled publicly  
23 available resources, generated through decades of work by the research community, into two  
24 models and a portal to support comprehensive systems analysis of *C. difficile*. First, by compiling  
25 a compendium of 148 transcriptomes from 11 studies we have generated an **Environment and**  
26 **Gene Regulatory Influence Network (EGRIN)** model that organizes 90% of all genes in the *C.*  
27 *difficile* genome into 297 high quality modules based on evidence for their conditional co-  
28 regulation by at least 120 transcription factors. EGRIN predictions, validated with independently-  
29 generated datasets, have recapitulated previously characterized *C. difficile* regulons of key  
30 transcriptional regulators, refined and extended membership of genes within regulons, and  
31 implicated new genes for sporulation, carbohydrate transport and metabolism. Findings further  
32 predict pathogen behaviors in *in vivo* colonization, and interactions with beneficial and detrimental  
33 commensals. Second, by advancing a constraints-based metabolic model, we have discovered  
34 that 15 amino acids, diverse carbohydrates, and 24 genes across glyoxylate, Wood-Ljungdahl,  
35 nucleotide, amino acid, and carbohydrate metabolism are essential to support growth of *C. difficile*  
36 within an intestinal environment. Models and supporting resources are accessible through an  
37 interactive web portal (<http://networks.systemsbiology.net/cdiff-portal/>) to support collaborative  
38 systems analyses of *C. difficile*.

39

## 40 INTRODUCTION

41 *Clostridioides difficile*, the etiology of pseudomembranous colitis, causes more than 500,000  
42 infections, 30,000 deaths, and \$5 billion per year in US healthcare costs (1). Infections arise  
43 through a variety of conditions that modulate the pathogen's ability to colonize and expand in the  
44 gut. Antibiotic ablation of the commensal microbiota creates altered nutrient states in intestinal  
45 environments due to lack of competition for nutrients from host, dietary or microbial origin. The  
46 pathogen modifies its endogenous metabolism to respond to these altered states, which  
47 stimulates subsequent cellular programs that can promote enhanced colonization and growth.  
48 Stress and starvation responses within *C. difficile* populations trigger responses that lead to  
49 sporulation, biofilm formation and release of mucosal damaging toxins (2–4).

50 Symptomatic infection requires the production of toxins from the *C. difficile* pathogenicity locus  
51 (PaLoc), which includes the genes *tcdA*, *tcdB* and *tcdE* that respectively encode the A and B  
52 toxins and holin involved in toxin export. The PaLoc also contains *tcdR*, a sigma factor specific  
53 for the toxin gene promoters, and *tcdC*, a TcdR anti-sigma factor (5, 6). Epidemic ribotype 027  
54 strains carry a second toxin locus, *cdt*, which includes the binary toxin genes *ctdA* and *ctdB*, and  
55 *cdtR* regulator, which has also been hypothesized to modulate PaLoc expression (7, 8). *C. difficile*  
56 elaborates toxin under starvation conditions to extract nutrients from the host and promote spore  
57 shedding (9–11). Regulation of PaLoc expression occurs via a complex network of TFs and small  
58 molecule inputs, of which direct primary regulators have been well described, but more complex  
59 and combinatorial effects remain unclear (11). Toxin production further triggers rapid and  
60 profound host immune responses, including release of reactive oxygen species (ROS) which  
61 substantially alters the redox state of the gut environment, and other innate immune responses  
62 that can induce *C. difficile* stress responses to cell wall, oxidative, and other damaging stimuli  
63 (12–15). As per all microbes, *C. difficile* adapts to complex, dynamic environments through

64 changes in metabolism coordinated by a gene regulatory network (16, 17). However, the  
65 mechanisms by which the gene regulatory network and metabolic pathways integrate to modulate  
66 *C. difficile* pathogenesis remain ill-defined (18, 19).

67 The *C. difficile* 630 (CD630) genome encodes 4,018 genes, with ~309 putative transcription  
68 factors (TFs; including sigma factors), 1,030 metabolic genes, and 1,330 genes (>30%) with  
69 unknown function (20, 21). The ATCC43255 strain of *C. difficile*, which is used to generate  
70 symptomatic infections in mice, encodes 4,117 genes and ~327 TFs, of which ~97% are  
71 significantly orthologous to genes encoded in the CD630 strain (22). To address questions  
72 regarding the broader systems-level interplay among genes in colonization and infection, we used  
73 computational modeling and network inference algorithms to construct an Environment and Gene  
74 Regulatory Influence Network (EGRIN) model for *C. difficile*. This model leverages a compendium  
75 of 148 published transcriptomes that surveyed responses of CD630 in diverse contexts. The  
76 EGRIN model consists of modules of putatively co-regulated genes identified based on their co-  
77 expression over subsets of conditions, enrichment of functional associations, chromosomal  
78 proximity, co-occurrence across phylogenetically related organisms, and presence of conserved  
79 DNA motif(s) within their promoter regions indicating regulation by the same TFs. Further, using  
80 regression analysis, EGRIN also captures the combinatorial regulation of genes within each  
81 module as a function of the weighted influences of TFs. The model supports a systems-level  
82 understanding of the infective capacity of this obligate anaerobe under different *in vitro* and *in vivo*  
83 conditions.

84 In addition to EGRIN, we have advanced a metabolic network model of *C. difficile* to understand  
85 how conditional regulation manifests physiologically, by adding reactions and associated genes  
86 supporting the exchange of nutrients required for growth in intestinal environments. We apply the  
87 EGRIN and metabolic models to predict conditional contributions of metabolic genes to the  
88 pathogen's fitness under different environmental conditions. Analyses support rational prediction

89 of context-specific vulnerabilities of the pathogen and uncover TFs driving essential adaptive  
90 responses under *in vitro* versus *in vivo* conditions. This analytic framework provides a new  
91 systems-level view of the transcriptional and metabolic networks that coordinate *C. difficile*'s  
92 colonization, growth, expression of toxin, and adaptations to changing environments with host  
93 infection. Our models identified multiple TFs that coordinate critical aspects within each of these  
94 components, including contributions from PrdR, which regulates the Stickland proline and glycine  
95 reductase systems and other energy-generating pathways, and Rex a regulator modulating  
96 energy balance in *C. difficile* (23, 24). These findings refine the context and roles of these and  
97 other regulators in *C. difficile* virulence, and provide specific targets of vulnerability for model-  
98 informed interventions against this pathogen. The compiled datasets, algorithms, and models can  
99 be explored interactively through a community-wide web resource at  
100 <http://networks.systemsbiology.net/cdiff-portal/>.

101

102

103

## 104 RESULTS

### 105 Reconstruction of the environment and gene regulatory influence network (EGRIN) model 106 for *C. difficile* 630

107 To investigate *C. difficile*'s transcriptionally-driven adaptive strategies we compiled 148 publicly  
108 available transcriptomic datasets from 11 independent studies using CD630 (**Table 1**). This  
109 compendium captures diverse transcriptional responses of *C. difficile* to commensals, *in vitro* or  
110 *in vivo* responses to different nutrient conditions, and consequences of targeted TF gene  
111 deletions. The transcriptome compendium together with functional associations from STRING  
112 (25), and all promoter sequences, was analyzed with a suite of network inference tools to infer an  
113 EGRIN model for *C. difficile* (**Fig. 1A**). The cMonkey2 biclustering algorithm (26) iteratively  
114 grouped functionally-associated genes into **modules** based on their co-expression across  
115 subsets of environments, and presence of similar cis-acting gene regulatory elements (**GREs**),  
116 providing mechanistic evidence for co-regulation. Subsequently, we used the Inferelator (27) to  
117 discover potential TFs of each module through a regression-based approach. The resulting  
118 EGRIN model organized 3,895 of 4,018 CD630 genes into 406 gene modules, and inferred  
119 module regulation by 148 of 309 genomically identified TFs that putatively act through GREs  
120 discovered within gene and operon promoters. Among the Inferelator implicated regulatory  
121 networks, 221 modules were controlled by more than one TF, and 75 were regulated by more  
122 than two TFs (**Fig. S1**). The TF module assignments support subsequent hypothesis-driven  
123 experimental analyses, including the design of ChIP-seq and TF-deletion experiments to validate  
124 the regulatory network architecture under physiologically relevant environmental contexts.

125

126 The quality of modules within the EGRIN model was evaluated using residual scores, which reflect  
127 the coherence of gene co-expression patterns. The lower the residual score, the higher the quality  
128 of the module. We determined using an empirical approach that a residual cutoff of 0.55 identified

129 a functionally meaningful set of 297 high quality modules (73% of the total 406 modules) based  
130 on the relative enrichment of related functions within modules that passed filtering (**Fig. 1B**).  
131 Incidentally, this empirically determined threshold was similar to the threshold used to identify  
132 high quality EGRIN gene modules for *Mycobacterium tuberculosis* (28). Altogether, the 297 high  
133 quality modules captured transcriptional regulation of 3,617 genes (90%) in CD630, with average  
134 membership of 20 genes per module (**Fig. 1C-D**). These metrics were consistent with models  
135 developed for other organisms (28, 29), a remarkable finding given that the transcriptional dataset  
136 used to construct the *C. difficile* model was less than 10% the size of ones used to construct  
137 models for other species.

138

### 139 **Validation of the modular architecture and regulatory mechanisms uncovered by the *C.*** 140 ***difficile* EGRIN model**

141 We tested the accuracy of the EGRIN model to reconstruct previously characterized regulons and  
142 recapitulate key aspects of *C. difficile* biology. To do so, we performed gene enrichment analysis  
143 within modules using an updated annotation of *C. difficile* genome (22). This analysis identified  
144 93 of 297 modules (31%) with significant enrichment of genes with related functions in 40  
145 pathways (hypergeometric test adjusted p-value  $\leq 0.05$ ). Among these pathways, 13 were over-  
146 represented in three or more modules (**Fig. 2A**), demonstrating the capacity of the model to  
147 discover conditional partition of cellular processes. We also investigated whether the EGRIN  
148 model had identified known regulatory interactions between TFs and their target genes. We  
149 compiled from literature the regulons (i.e. target genes) of 13 previously characterized TFs in *C.*  
150 *difficile*, representing a network of 1,353 TF-gene interactions (**Table S1**). Notably, a total of 65  
151 modules (22% of all high-quality modules) were significantly enriched with nine of these TF  
152 regulons (**Fig. 2B**). The EGRIN model recapitulated 541 of the 1,212 (45%) previously  
153 characterized interactions. This value is consistent with the recall rate of the EGRIN model for *M.*

154 *tuberculosis* (41%-49%) (28). The poor recall of the remaining four regulons (141 regulatory  
155 interactions) could be due to underrepresentation of gene expression data from relevant  
156 conditions in which these regulons are conditionally active. This analysis also uncovered  
157 combinatorial regulation of genes across 19 modules (i.e. enriched with more than one TF  
158 regulon). Consistent with the known hierarchical scheme for regulation of sporulation (30),  
159 expression of 161 genes across at least eight modules were putatively influenced by Spo0A in  
160 combination with one or more alternative sigma factors implicated in sporulation (e.g., SigE).  
161 EGRIN also predicted CcpA contributions in seven additional modules in combination with CodY,  
162 PrdR and SigL, illustrating the complexity of modular transcriptional regulation in *C. difficile*.

163

164 The biclustering of genes by cMonkey2 is constrained by the *de novo* discovery of a conserved  
165 GRE(s) within their promoters in order to cluster genes that are co-regulated, and not just co-  
166 expressed. The GREs represent putative binding sites for TFs that are often independently  
167 implicated by the Inferelator and protein-DNA interaction maps as regulators of genes within the  
168 same module(28, 29, 31). Notably, we determined that the GREs within promoters of genes in  
169 modules #182 and #309 were similar to known binding sites for CodY and SigL, which are  
170 predicted regulators of those modules, and are among the very few TFs for which binding sites  
171 have been characterized (**Fig. 2C-D**).

172

173 The EGRIN modules also detected co-regulation of genes within and across functionally related  
174 operons. For example, module #152, which is enriched with the SigD regulon, contains 16 genes  
175 that were part of four operons including the flagellar operon *flgG1G-fljMN-CD630\_02720-htpG*, in  
176 addition to *pyrBKDE*, *CD630\_30270-CD630\_30280-malY-CD630\_30300*, and *CD630\_32430-  
177 prdA*. *De novo* search for TF motifs traditionally use dozens of sequences to identify putative  
178 GREs. With the amount of transcriptomic information available, further robust prediction of  
179 putative GREs was limited by available numbers of putative binding sites after genes were



180 organized into predicted operon structures. In addition, multiple modules with statistically  
181 significant GREs could not be matched to characterized TFs due to the limited number of TFs  
182 with known motifs in *C. difficile*. These limitations can be overcome with additional transcriptomic  
183 datasets, as leveraged for EGRIN model development for other species.

184

### 185 ***C. difficile* EGRIN model uncovers regulatory networks for the Pathogenicity Locus**

186 We evaluated capacity for the EGRIN model to recall known mechanisms of PaLoc regulation,  
187 and to provide new information regarding complex regulatory and small molecule effects. The  
188 EGRIN model captured certain previously described effects of CodY on toxin gene expression  
189 (**Fig. 2E**), as shown in module #182, which is enriched with members of the CodY regulon  
190 including *tcdA*. In agreement with EGRIN-predicted CodY regulation of PaLoc genes in module  
191 #182, genes encoding the toxin *tcdA* and its regulator *tcdR* were significantly overexpressed upon  
192 deletion of *codY* (**Fig. 2G**). Interestingly, *tcdB* which was co-regulated with sporulation genes in  
193 module #397 was also significantly upregulated in the *codY* deletion strain, suggesting that this  
194 effect might be an indirect consequence of disrupted CodY regulation of *tcdR* (**Fig. 2G**). It is  
195 assumed that CodY acts on PaLoc gene expression primarily through its repression of *tcdR*.  
196 Putative lower affinity binding sites have been suggested in the toxin gene promoter regions (32).  
197 The presence of the CodY motif (**Fig. 2C**) in most members of module #182, including *tcdA*  
198 (purple font in **Fig. 2E**) suggests direct influence of CodY on *tcdA* gene expression. The EGRIN  
199 model also identified previously reported connections between sporulation and toxin production  
200 (33). *tcdB* was assigned to module #397, which was significantly enriched with genes controlled  
201 by Spo0A, the master regulator of sporulation (**Fig. 2F**). Additional members of the PaLoc were  
202 assigned to other modules, supporting the presence of multiple condition-dependent promoters  
203 within the PaLoc (**Table S2**).

204

### 205 **Assignment of putative functions to genes in EGRIN modules**

206 Approximately 33% of gene features in the CD630 genome have unknown functions. Thus, the  
207 *C. difficile* EGRIN model emerges as a resource to assign putative functions to uncharacterized  
208 genes based on functional associations among co-regulated genes (i.e. guilt-by-association)(34).  
209 We predicted putative functions for 48 uncharacterized genes by mining underlying functional  
210 enrichment of modules under different experimental conditions (see methods). These 48  
211 previously uncharacterized genes were associated with 13 functional categories, including  
212 “Sporulation” and “Other sugar-family transporters” (**Fig. 3A**).

213  
214 Ten genes were putatively assigned sporulation-related functions based on their co-regulation in  
215 the sporulation associated modules #206 and #251 (**Fig. 3B**). Module #251 includes the  
216 sporulation-associated alternative sigma factors SigG and SigE (located in the same operon).  
217 Module #206 includes seven stage III sporulation genes (*spolIIIAA*, *spolIIIB*, *spolIIIC*, *spolIIID*,  
218 *spolIIIE*, *spolIIIF* and *spolIIIG*), and two stage IV sporulation genes (*spoIV*, *spoIVA*). Reduced  
219 expression of the 10 putative sporulation genes upon deletion of sporulation-associated sigma  
220 factors suggested putative roles within the mother cell or the forespore. Seven genes are likely  
221 associated with mother cell-specific roles based on their decreased expression in *sigE* (six genes)  
222 and *sigK* (one gene) deletion strains (**Table S1**). Two additional genes were down-regulated in a  
223 *sigG* deletion strain, suggesting putative functions in the forespore. Notably, Tn-seq studies for  
224 gene essentiality in *C. difficile* identified seven of these 10 genes as required for sporulation (35).

225  
226 Module #43 contains six genes, organized in a single operon (CD630\_15840-15890), associated  
227 with the category “Other Sugar-family transporters”. Studies by Antunes et al. (3) identified  
228 members of the CD630\_15840-15890 operon to be regulated by glucose and indirectly by CcpA.  
229 Thus, the 12 uncharacterized genes included in module #43 may also be associated with the  
230 same functional category (**Fig. 3C**). Two of these uncharacterized genes (CD630\_13011 and  
231 CD630\_29661) were also identified as CcpA targets in the presence of glucose (3). These

232 EGRIN-predicted functional assignments are consistent with the known role of CcpA in regulating  
233 sugar transport and metabolism (3).

234

235 Module #48 contains two adjacent operons (*4hbd-cat2*-CD630\_23400-*abf2* and *sucD-cat1*)  
236 associated with aminobutanoate degradation. Both operons are regulated by CodY and PrdR.  
237 Hence, we predicted that the four uncharacterized genes in this module may be also involved in  
238 amino acid metabolism (**Fig. 3C**). In support of this hypothesis, CD630\_08760 and CD630\_08780  
239 are both differentially expressed upon *codY* deletion. Recent studies also suggest that CD630\_  
240 08760 may function as a tyrosine transporter per its homology to the CodY-regulated neighbor  
241 gene, CD630\_08730 (36). Furthermore, Steglich et al. (37) observed decreases in tyrosine uptake  
242 and Stickland fermentation in clinical isolates lacking CD630\_08760 and CD630\_08780.

243

#### 244 **EGRIN uncovers differentially active regulatory networks during *in vivo* infection**

245 We investigated the differential expression of EGRIN modules across multiple published *in vivo*  
246 experiments to discover underlying regulatory mechanisms that drive *C. difficile*'s colonization  
247 and adaption to *in vivo* environments. This analysis discovered the *in vivo* activation of module  
248 #158, particularly during acute infection, and the down regulation of module #48; notably the latter  
249 was upregulated during early infection (**Fig. 4A-B**). Module #48 is enriched with members of the  
250 CodY and PrdR regulons, as described above. Module #158 is enriched for putative PrdR and  
251 EutV co-regulated ethanolamine utilization genes, including *eut* operons for a 2-component  
252 histidine kinase sensing system and carboxysome structural proteins that house the ethanolamine  
253 fermentative enzymes (38). Ethanolamine is prevalent within gut secretions and is also released  
254 from damaged host tissues, providing a readily available carbon and nitrogen source for *C.*  
255 *difficile*. The predicted co-regulation of this gene module by PrdR suggests additional *in vivo*  
256 functions of this regulator to optimize *C. difficile*'s metabolism in gut environments.

257

258 With capacity to identify intestinal contributions to *C. difficile* responses we leveraged the EGRIN  
259 model to analyze commensal modulation of the pathogen's virulence, using transcriptomic  
260 datasets from gnotobiotic mice that were mono-colonized with the mouse-infective strain *C.*  
261 *difficile* ATCC43255 or co-colonized with *C. difficile* and the protective gut commensal species  
262 *Paraclostridium bifermentans* (PBI), or infection-worsening species *Clostridium sardiniense*  
263 (CSAR). These datasets were not used in model construction. By mapping sets of differentially  
264 expressed genes into the EGRIN model we uncovered modules across 20 cellular processes and  
265 their associated TFs that were differentially regulated in the presence of PBI or CSAR (**Fig. 4C-**  
266 **F**).

267  
268 Two sporulation-enriched modules (modules #206 and #261) were up-regulated by 24h of  
269 infection in monocolonized mice (**Fig. 4C**). The same two modules were up-regulated by 24h of  
270 infection in CSAR co-colonized mice, in addition to four other modules also enriched with  
271 sporulation genes (modules #82, #223, #242, #251 in **Fig. 4D**). These six modules were enriched  
272 with the Spo0A regulon. On the other hand, no sporulation-enriched modules were detected by  
273 24h of infection in PBI co-colonized mice (**Fig. 4E**). Comparison of CSAR co-colonized mice and  
274 PBI co-colonized mice discovered four sporulation-enriched modules (including modules #206  
275 and #261) with increased expression in the virulent context (i.e. presence of CSAR) (**Fig. 4F**).  
276 These findings were confirmed with the high levels of spore release in expanded populations of  
277 vegetative *C. difficile* when co-colonized with CSAR (22). Overall, this analysis suggested that  
278 the sporulation pathway is an indicator of *C. difficile* disease, reinforcing the Spo0A-mediated link  
279 between sporulation and toxin production recapitulated by the model (**Fig. 2F**).

280  
281 Module #319 contains multiple genes associated with electron transport via Rnf ferredoxin  
282 systems, and steps in glycolytic, butanoate and succinate metabolic pathways. This module was  
283 upregulated at later stages of infection in monocolonized mice at 24h (**Fig. 4C**), and was also up-

284 regulated in CSAR co-colonized mice when compared to PBI co-colonized mice (**Fig. 4F**). Module  
285 #319 was consistently down-regulated in mice co-colonized with the protective commensal PBI  
286 (**Fig. 4E**). These findings show associated activation of multiple co-regulated energy generating  
287 pathways in hypervirulent states of *C. difficile*. Because the EGRIN model identified the  
288 NAD<sup>+</sup>/NADH sensing regulator Rex as a potential activator of module #319, the observed down-  
289 regulation of module #319 in PBI co-colonized mice indicates decreased Rex activity. This may  
290 explain why a *rex* deletion strain supported increased survival in hamsters (24).

291  
292 Five modules enriched with the SigD-regulated genes encoding subunits of flagella (modules  
293 #184, #187, #295, #296 and #358) were downregulated in monocolonized mice at 24h (**Fig. 4C**).  
294 Similarly, two modules enriched with SigD-regulated motility genes (modules #152 and #295)  
295 were downregulated in CSAR co-colonized mice (**Fig. 4D**). From these modules, only module  
296 #152 was downregulated in PBI co-colonized mice (**Fig. 4E**), indicating that motility may be  
297 repressed to redirect resources toward pathogenesis. This finding is supported by increased  
298 virulence of *C. difficile* strains lacking a functional flagella (39). Surprisingly, module #273  
299 enriched with the SigD regulon but not with flagellar genes was downregulated in PBI co-  
300 colonized mice (**Fig. 4E**) but upregulated in CSAR co-colonized mice (**Fig. 4F**). One of the genes  
301 in this module *luxS* encodes a protein involved in the synthesis of the quorum sensing signal, and  
302 its over-expression increases toxin expression (40). While it is unclear whether SigD plays a role  
303 in the expression of this module, these observations suggest that downregulation of module #  
304 273 and *luxS* (through a still uncharacterized mechanism) may contribute to the PBI-mediated  
305 reduction of *C. difficile* virulence. In summary, the described EGRIN modules illustrate the  
306 potential of the model to uncover additional co-regulated genes and cellular functions that enable  
307 states of enhanced virulence within *C. difficile*, and support multiple additional hypotheses for  
308 experimental validation.

309

310 **Metabolic network analyses elucidate *in vivo* metabolic adaptations of *C. difficile***

311 To investigate how specific genes within *C. difficile* contribute to *in vivo* phenotypes needed to  
312 develop symptomatic infection we leveraged reconstructed metabolic models that mapped  
313 functionally annotated genes to curated biochemical reactions. We extended a previously  
314 developed icdf834 metabolic model for *C. difficile* strain 630 (41, 42). The icdf834 model  
315 incorporates 1227 metabolic reactions and 807 metabolites. The metabolic reactions were  
316 mapped through gene-protein-reaction (GPR) associations to 834 genes, which represent 80%  
317 of 1,030 identified metabolic genes in the CD630 genome (**Fig. 5A**). We increased the number of  
318 genes in the icdf834 model from 834 to 838 (**Fig. 5B**), and added six new exchange reactions to  
319 account for *C. difficile*'s capacity to utilize mannitol, fructose, sorbitol, raffinose, succinate and  
320 butanoate (43, 44) (**Fig. 5B**). We also added four genes (CD630\_08700, CD630\_08680,  
321 CD630\_17090 and CD630\_10810) that encode three reactions for molybdenum utilization and  
322 cofactor synthesis. Lastly, we updated pathway annotations to reflect those found in obligate  
323 anaerobes. For example, the tricarboxylic citric acid cycle (TCA) is not found in most anaerobes,  
324 though some reactions, in reverse, support aspects of pyruvate, succinate and oxaloacetate  
325 metabolism. In the icdf834 model, we changed subsystem pathway annotation of two reactions -  
326 i) acetyl-CoA:oxaloacetate C-acetyltransferase and ii) succinyl-CoA synthase from TCA cycle to  
327 pyruvate metabolism and butanoate fermentation respectively (**Supplementary File S1**). Similar  
328 updates were performed for reactions originally assigned to gluconeogenesis and the pentose  
329 phosphate pathway. We refer to this updated model as icdf838. Lastly, the model derived from  
330 CD630 was compared with the gene feature content from *C. difficile* ATCC43255, used commonly  
331 in mouse infection models. The two strains shared 92% of metabolic genes and predicted  
332 pathways (768 out of 838 genes in the icdf838 model have homology with the ATCC43255 strain;  
333 **Supplementary File S1**).

334

335 We validated the completeness and accuracy of this model by confirming its ability to predict  
336 biomass production in three different *in vitro* media compositions: 1) minimal medium, 2) basal  
337 defined medium and 3) complex, nutrient-rich medium (see Larocque et al. 2014 (42) for media  
338 compositions). The model accurately predicted *C. difficile*'s requirements for six amino acids:  
339 cysteine, leucine, Isoleucine, proline, tryptophan and valine (45). We also tested the performance  
340 of this "*in silico broth*" model for accuracy in predicting gene essentiality by comparing our model  
341 predictions to results from Tn-seq fitness screen performed *in vitro* under nutrient-rich conditions  
342 (35). With a threshold cutoff of 95% predicted growth inhibition, receiver-operator curve (ROC)  
343 analyses demonstrated high sensitivity and specificity of the model predictions (**Fig. 5C**; area  
344 under curve = 0.7626; p-value=0.015), indicating capacity for the model to distinguish essential  
345 versus non-essential gene calls with a true positive rate (sensitivity) of 0.9791 and a false positive  
346 rate (specificity) of 0.5431(**Fig. 5C**).

347  
348 We next extended and applied the model to predict *C. difficile* behaviors and gene essentiality *in*  
349 *vivo*. *C. difficile* transcriptomes from specifically-colonized gnotobiotic mice (22) were used as  
350 input into the GIMME algorithm (46). Analyses of expressed transcripts *in vivo* identified 665  
351 active reactions (**Fig. 5B**) within the icdf838 model during colonization, growth, and over the  
352 course of symptomatic infection. Leveraging information from the *in vitro* studies, the model made  
353 two notable predictions *in vivo* regarding the pathogen's metabolism. First, the icdf838 model  
354 predicted 15 amino acids to be required for *C. difficile* growth in contrast to the 6 required *in vitro*  
355 (**Supplementary File S1**). These amino acids included the dominant Stickland-fermented amino  
356 acids that were also required *in vitro*, including proline and branched chain amino acids, and  
357 additional amino acids including arginine, glutamate, lysine and methionine, which also have  
358 multiple cellular functions in cell wall synthesis, nitrogen cycling, and responses to oxidative  
359 stress. Secondly, the model predicted *C. difficile*'s switch from preferential use of glucose as a  
360 carbon source *in vitro* in complex media, to simultaneous utilization *in vivo* of diverse carbohydrate

361 sources including fructose, galactose, maltose, and sugar alcohols such as mannitol and sorbitol,  
362 to promote colonization and growth (**Supplementary File S1**). Seven of these carbohydrate  
363 sources were described in other *in vivo* mouse infection studies illustrating support for these  
364 findings across *C. difficile* strains, and in germfree and conventional mouse models  
365 (**Supplementary File S1**) (43, 44, 47).

366  
367 We next used the metabolic model to identify essential metabolic genes and networks that  
368 promote *C. difficile*'s growth *in vivo*. Gene deletions predicted to reduce the pathogen's *in vivo*  
369 growth by  $\geq 95\%$  identified 24 genes, involved in 1 carbon-cycling reactions in glyoxylate and  
370 Wood-Ljungdahl metabolism, nucleotide biosynthesis, nucleotide interconversion and salvage  
371 pathways, amino acid biosynthetic and metabolic reactions, and aspects of central carbohydrate  
372 metabolism (**Fig. 5D-E**). These metabolic pathways represent new potential targets that drive  
373 aspects of *C. difficile*'s colonization and subsequent growth which are required to develop  
374 symptomatic infections. Model predictions also illustrated *C. difficile*'s predicted shift from  
375 carbohydrate utilization towards amino acid utilizing pathways *in vivo*, as shown by the enhanced  
376 set of 15 amino acids, including the preferred Stickland donor and acceptor amino acids (leucine  
377 and proline) known to support metabolism and growth (43, 44, 47). Notably, many of these amino  
378 acids show high abundance within the gut lumen in gnotobiotic and conventional colonization  
379 states that enhance *C. difficile*'s capacity to colonize and expand (22).

380

### 381 **The Cdiff Web Portal, a resource for the *C. difficile* community**

382 We have released a new *C. difficile* Web Portal (<http://networks.systemsbiology.net/cdiff-portal/>)  
383 to provide a discovery and collaboration gateway for the *C. difficile* scientific community. The  
384 portal aims to accelerate the advancement of the science and understanding of *C. difficile* biology,  
385 gene regulation, and metabolism on its virulence. Within the portal users can access publicly



386 available datasets (e.g. transcriptional compendia), models, software and supporting resources.  
387 The Portal includes information on more than 4,000 *C. difficile* genes, 1,227 metabolic reactions,  
388 and 406 co-regulated gene modules. Genes can be explored in the context of genome  
389 annotations, expression profiles, regulatory and metabolic membership, and other functional  
390 genomic information across different databases including COG, Uniprot, and PATRIC (48–50).  
391 The portal provides access to detailed information on (1) Genes, (2) predicted Gene Modules,  
392 and (3) Metabolic Reactions (**Fig. S2**).

393  
394 Each gene module page includes summary statistics for the module, expression profiles of the  
395 module genes across conditions incorporated in developing the model, regulatory motifs,  
396 regulatory influences from transcription factors, functional enrichment information, and  
397 information about regulon member genes (**Fig. 6**). The module pages are structured to facilitate  
398 the assessment of the quality and statistical significance of the modules and highlight functional  
399 connections. The portal includes a table of metabolic reactions with details of each reaction,  
400 associated genes, metabolites, and sub-systems. Metabolites and sub-systems are defined as  
401 taxonomic vocabularies that collect and group associated reactions to identify related metabolic  
402 processes. In addition, the portal provides access to algorithms, software, and data, and will  
403 include information about animal models, strains, and other *C. difficile* relevant community  
404 resources. As additional datasets are communicated, model predictions and tools will be  
405 successively enhanced to support systems-level analyses and assist in hypothesis generation in  
406 *C. difficile* biology and to enable tangible clinical interventions.

407

## 408 **DISCUSSION**

409 The obligate anaerobe *C. difficile* is unique among gut anaerobes in possessing a diverse carbon  
410 source metabolism to enable colonization and growth in gut environments. These systems further  
411 exist within a complex network of gene regulatory modules that modulate growth, energy balance,  
412 and stress responses *in vivo*. Capacity to understand these systems-level integration points has  
413 remained challenging in the absence of robust systems biology models to infer *C. difficile*'s *in vivo*  
414 behaviors. We acknowledge the detailed studies from multiple groups over prior decades that  
415 provided a critical mass of information on *C. difficile*'s nutrient and gene-level responses to  
416 support development of an EGRIN model, the first for a gut anaerobe and toxigenic species. We  
417 emphasize that this information, the most for any obligate anaerobe, still represents a small  
418 fraction of that normally used to develop thorough EGRIN models. Recent improvements in the  
419 genetic manipulation of *C. difficile*, including the mouse infective strain ATCC43255, open new  
420 capacity to probe the GREs modulating critical aspects of its metabolism, growth and virulence,  
421 from a systems-level perspective.

422

423 The *C. difficile* EGRIN model enables a number of predictions relevant to *in vivo* disease. For  
424 example, the PrdR regulator of the pathogen's Stickland proline reductase (*prd*) and other genes,  
425 has long been hypothesized to have a role in PaLoc gene expression through as-yet unknown  
426 mechanisms. EGRIN predictions included gene regulatory module #182 which identified  
427 combined PrdR and CodY effects on *tcdA* gene expression, providing a regulatory integration  
428 point and broader set of co-regulated genes to support further experimental analyses of co-  
429 regulation between these two transcription factors, including effects on PaLoc expression.

430 Biclustering also identified interactions between Spo0A, another regulator hypothesized to  
431 modulate PaLoc expression, and *tcdB* expression in module #397. The identified modules,  
432 associated genes and regulators provide new information to support further experimental

433 investigation of combinatorial effects of these and other regulators identified in PaLoc gene-  
434 associated biclusters. The EGRIN model also predicted PrdR as a critical regulator *in vivo* through  
435 its systems-level effects on the pathogen's colonization, metabolism and growth, involving  
436 multiple direct and indirect effects upon other modules and aspects of the pathogen's metabolism  
437 and gene regulation.

438

439 The present model did not identify all experimentally known regulators of PaLoc expression,  
440 including SigD regulation of TcdR, and effects of other more recently identified PaLoc regulators  
441 such as RstA and LexA, for which limited datasets exist from targeted deletion mutants or under  
442 multiple nutrient and other environmental perturbations. Nonetheless, as shown with our *in vivo*  
443 analyses, application of the EGRIN and metabolic models to new datasets offers key insights into  
444 causal mechanistic drivers of adaptive strategies of the pathogen. Given that less than 10% of  
445 transcriptomic information and less than 1% of ChIP-seq regulator datasets were available for *C.*  
446 *difficile* 630, as compared to EGRIN models developed for other species, the model provides a  
447 formative tool to design future transcriptomic and ChIP-seq studies to improve predictions for  
448 these regulons.

449

450 Leveraging additional Tn-seq and *in vivo* transcriptomic datasets, the expanded icdf838 model  
451 identified a broader set of amino acids, in addition to genes and anaerobe-specific pathways,  
452 needed to support colonization and growth expansion *in vivo*. Notably, predictions of *in vivo* gene  
453 essentially identified multiple genes in glyoxylate metabolism, a pathway essential in many  
454 acetogenic anaerobes (51, 52) that leverage this system with folate 1-carbon cycling pathways  
455 including those connected with Wood-Ljungdahl fixation of carbon dioxide to acetate. Predictions  
456 of gene essentiality also identified multiple nucleotide synthesis and salvage pathway genes that  
457 were essential *in vivo* but not *in vitro*, including ones associated with xanthine transport and  
458 metabolism, an abundant nucleotide in gut secretions that originates from host sources (22).

459 Lastly, predictions identified genes in amino acid biosynthetic pathways for branched-chain amino  
460 acids, aromatic amino acids, and others that were predicted to be required *in vivo*. Each of these  
461 provides new targets of vulnerability for which to consider therapeutic interventions leveraging  
462 small molecules, bacteriotherapeutic, or other patient interventions.

463  
464 We illustrate additional predictions from the *C. difficile* EGRIN model to enable gene- through  
465 systems-level analyses of the pathogen. Though among the best described obligate anaerobes,  
466 the *C. difficile* genome still contains a high number of genes of unknown function. Model  
467 predictions provided new information to assign putative functions to 48 gene features, including  
468 ones associated with sporulation, carbohydrate transport, and other aspects of cellular  
469 metabolism. The *C. difficile* Web Portal, makes these tools and resources available to the broader  
470 *C. difficile*, microbiology, and systems biology communities, providing a platform for collaboration  
471 and to support systems-level investigations of the pathogen and its interactions with the host and  
472 commensal microbiota.

473

474

475

476

## 477 **METHODS**

### 478 ***C. difficile* genome annotation**

479 A new ATCC43255 reference genome was generated and annotated to support *in vivo*  
480 transcriptome studies of *C. difficile* per discrepancies noted in the RefSeq genome, particularly  
481 among bacteriophage loci and other mobile elements (22). The updated reference genome was  
482 annotated using the NCBI Prokaryotic Genome Automatic Annotation Pipeline (53), PATRIC (50),  
483 and PROKKA (54) to extract gene features for support of transcriptome pathway enrichment  
484 analyses. Bacteriophage loci and genes were identified using PHASTER (55).

485

### 486 ***C. difficile* transcriptional compendium**

487 To generate a transcriptional compendium for *C. difficile*, required for constructing an EGRIN  
488 model, a total of 148 publicly available transcriptomes of *C. difficile* 630 were downloaded from  
489 the NCBI Gene Expression Omnibus (GEO) repository (56) in March 2020. Downloaded  
490 transcriptomes were generated by 11 independent studies (**Table 1**). To integrate this data into a  
491 single dataset, we computed the log<sub>2</sub> fold-change of each transcriptome with respect to a control  
492 condition, as performed in the generation of other transcriptional compendia (57). This step was  
493 not necessary for transcriptional data collected with dual channel arrays that included a  
494 normalizing control channel. The resulting transcriptional compendium contained a total of 4,091  
495 gene features and 127 conditions. The 127 conditions in the transcriptional compendium were  
496 organized in 10 distinct conditional blocks (e.g. sporulation, *fur* deletion), as shown in **Table 1**.

497

### 498 **Construction of the EGRIN model**

499 The EGRIN model for *C. difficile* was constructed in two stages. First, we used cMonkey2 (26), a  
500 biclustering algorithm, on the compiled compendium of 127 *C. difficile* transcriptomes to  
501 simultaneously detect co-regulated gene modules and the conditions where co-regulation occurs.

502 cMonkey2 integrates functional annotation from the STRING database (25), gene promoter  
503 sequences from the RSAT database (58), and operon predictions from MicrobesOnline (59) when  
504 detecting the gene modules. cMonkey2 was run using default parameters. Briefly, we used 2,000  
505 iterations to optimize the co-regulated gene modules, each one with 3-70 genes. In each iteration,  
506 cMonkey2 refined the gene modules by evaluating and modifying (if necessary) condition and  
507 gene memberships. cMonkey2 biclustering approach allowed genes and conditions to be  
508 assigned to a maximum of two and 204 different modules, respectively. *De novo* motif search was  
509 performed using MEME v. 4.12.0 (60). Second, we used the Inferelator (27), a network inference  
510 algorithm, to identify potential transcriptional regulators for the 406 gene modules generated by  
511 cMonkey2. The Inferelator uses a Bayesian best subset regression to estimate the magnitude  
512 and sign (activation or repression) of potential interactions between TFs and gene modules. We  
513 bootstrapped the expression data (20 times) to avoid regression overfitting (27). The Inferelator  
514 generates two scores for each TF-module interaction, the corresponding regression coefficient  
515 and a confidence score. The second score indicates the likelihood of the interaction. The final set  
516 of TF-module interactions was defined as the 704 interactions with the top 10% of highest non-  
517 zero confidence scores.

518

### 519 **Experimentally supported literature derived TF regulons**

520 We mined available literature to compile a list of experimentally supported targets for the 13  
521 partially characterized transcriptional regulators (involved in sporulation, motility, carbon  
522 metabolism, among other processes) shown on **Table S1**. The manually compiled regulons  
523 represented a total of 1,353 regulatory interactions and involved 1,050 genes. Target genes  
524 included in the compiled TF regulons were supported by transcriptional data, protein-dna binding  
525 data and *in silico* analysis of promoter regions (e.g. presence of known regulators DNA binding  
526 motif).

### 527 **Module enrichment evaluation**

528 We used a hypergeometric test to identify modules of co-regulated genes in the EGRIN model  
529 that were statistically enriched with manually compiled TF regulons (**Table S1**) or functional  
530 pathways derived from curated annotation of *C. difficile* genome (22). Only gene modules with  
531 adjusted hypergeometric test p-value  $\leq 0.05$  and containing four or more genes from the relevant  
532 TF regulon or functional pathway were considered enriched.

533

### 534 **Analysis of *in vivo* data**

535 *In vivo* transcriptomic data from gnotobiotic mice monocolonized with *C. difficile* ATCC43255 or  
536 co-colonized with *P. bifermentans* or *C. sardiniense* were analyzed as described (22) using the  
537 updated reference genome of ATCC43255 to extract gene features for subsequent analysis with  
538 DESEQ2.

539

### 540 **Metabolic model refinement and gene essentiality prediction**

541 A published genome-scale metabolic model of *C. difficile* 630 strain, icdf834 (41), was used in  
542 this study and expanded by adding reactions required for *in vivo* survival of the pathogen. We  
543 also curated pathway annotations that were incorrectly designated using default KEGG  
544 annotations (61). For example, the TCA, gluconeogenesis and pentose phosphate pathways are  
545 incomplete in *C. difficile*. Thus, we updated the annotation of these pathways as part of pyruvate  
546 metabolism, butanoate fermentation and Galactose & Tagatose metabolism (**Supplementary**  
547 **File S1**). Initially, we evaluated the homology of metabolic genes between *C. difficile* 630 and  
548 ATCC43255 strain of *C. difficile* in order to use the icdf834 model for representing the *in vivo*  
549 infection state of ATCC43255 strain. The details of 764 genes that are predicted in this homology  
550 analysis is provided in **Supplementary File S1**. Then, the transcriptome of *C. difficile* profiled  
551 from *in vivo* infections of specifically-colonized gnotobiotic mice (22) was mapped onto the icdf834  
552 model using the GIMME algorithm (46). This resulted in a model with 665 active reactions, with  
553 no changes in the number of genes. We then expanded the model by including four new genes

554 and 8 new reactions (**Supplementary File S1**) that are required for the growth of the pathogen in  
555 the *in vivo* micro-environment, based on KEGG annotations. We named this expanded version of  
556 the model as “icdf838”. This model represents the *in vivo* state of *C. difficile*. We then applied the  
557 constraint-based method for simulating the metabolic steady-state of *C. difficile* using flux-balance  
558 analysis (FBA) (46, 62). The initial validation steps involved checking the capacity of the icdf834  
559 model to produce biomass in defined media conditions including 1) minimal medium, 2) basal  
560 defined medium and 3) complex, nutrient-rich medium (compositions used according to Larocque  
561 et al 2014 (42)). Then, we tested the performance of the icdf834 model using gene essentiality  
562 predictions by FBA. A gene was considered “essential” if its deletion reduced the biomass by  
563 >95%. By this analysis, the model classified each gene as “essential” or “non-essential”. We  
564 compared the gene essentiality predictions from nutrient-rich media constraints with the available  
565 experimental Tn-seq data (35) and deduced the confusion matrix to derive true positive rates  
566 (TPR) and false positive rates (FPR). This led to the elucidation of sensitivity and specificity of the  
567 model using ROC curve analysis. We then applied the same strategy and predicted the essential  
568 genes *in vivo* using FBA with the expanded context-specific network, icdf838. All model  
569 simulations related to FBA were performed on MATLAB\_R2019a platform using the recent  
570 version of COBRA (The COntstraint-Based Reconstruction and Analysis) toolbox (63). *In silico*  
571 gene essentiality predictions were performed using the COBRA toolbox ‘single-gene-deletion’  
572 function in MATLAB. The illustration of essential gene regulatory network *in vivo* was deduced  
573 using BioTapsetry tool (<http://www.biotapestry.org/>).

574

### 575 ***C. difficile* Web Portal**

576 This portal utilizes the powerful build, search, collaboration, and visualization features of the  
577 Drupal content management system. With the two key features of modularity and extensibility,  
578 Drupal provides a slim, powerful core that can be readily extended through custom modules and  
579 easy-to-use collaborative tools to support information sharing. Based on these key features, we



580 developed this content management system into a data management, analysis, and visualization  
581 framework to support *C. difficile* research.

582  
583 Due to the complexity of the information provided by the genome and models, it is critical to  
584 provide a user-friendly and flexible search and filtering capabilities. By taking advantage of  
585 Drupal's built-in search interface and implementing Apache Solr search, we created very powerful  
586 search capabilities that will query every information included in the portal database. Moreover,  
587 the search interface uses "facets" to allow users to explore a collection of information by applying  
588 multiple filters. This combination together with sorting enables users to start with broad searches  
589 and then quickly pinpoint specific information.

590  
591 In order to provide a comprehensive functional genomics resource for the Cdiff community,  
592 genome annotations from several different sources were merged and imported into the Cdiff  
593 Portal. Curated genome annotations for *Clostridium difficile* strain 630 published by Monot et al.  
594 (21), were downloaded from MicroScope platform (64). Additional functional annotations were  
595 downloaded from PATRIC (50) and Uniprot (49) and merged with curated genome annotations.  
596 Overall, 4,018 genes were included in the Cdiff Portal. The *C. difficile* genome included 1,030  
597 metabolic genes, 309 TFs, 270 sRNAs, 87 tRNAs, 32 rRNAs and 17 miscRNAs. The genome  
598 included 1,330 genes with unknown function. Furthermore, gene essentiality data from Dembek  
599 et al. (35) was integrated with gene annotations.

600

601

## 602 REFERENCES

- 603
- 604 1. Monegro AF, Regunath H. 2018. Hospital acquired infections StatPearls. StatPearls  
605 Publishing.
  - 606 2. Aktories K. 2011. Bacterial protein toxins that modify host regulatory GTPases. *Nat Rev*  
607 *Microbiol* 9:487–498.
  - 608 3. Antunes A, Camiade E, Monot M, Courtois E, Barbut F, Sernova N V, Rodionov DA,  
609 Martin-Verstraete I, Dupuy B. 2012. Global transcriptional control by glucose and carbon  
610 regulator CcpA in *Clostridium difficile*. *Nucleic Acids Res* 40:10701–10718.
  - 611 4. Saujet L, Monot M, Dupuy B, Soutourina O, Martin-Verstraete I. 2011. The key sigma  
612 factor of transition phase, SigH, controls sporulation, metabolism, and virulence factor  
613 expression in *Clostridium difficile*. *J Bacteriol* 193:3186–3196.
  - 614 5. Matamouros S, England P, Dupuy B. 2007. *Clostridium difficile* toxin expression is  
615 inhibited by the novel regulator TcdC. *Mol Microbiol* 64:1274–1288.
  - 616 6. Mani N, Dupuy B. 2001. Regulation of toxin synthesis in *Clostridium difficile* by an  
617 alternative RNA polymerase sigma factor. *Proc Natl Acad Sci* 98:5844–5849.
  - 618 7. Smits WK, Lyras D, Lacy DB, Wilcox MH, Kuijper EJ. 2016. *Clostridium difficile* infection.  
619 *Nat Rev Dis Prim* 2:1–20.
  - 620 8. Lyon SA, Hutton ML, Rood JI, Cheung JK, Lyras D. 2016. CdtR regulates TcdA and TcdB  
621 production in *Clostridium difficile*. *PLoS Pathog* 12:e1005758.
  - 622 9. Walter BM, Rupnik M, Hodnik V, Anderluh G, Dupuy B, Paulič N, Žgur-Bertok D, Butala  
623 M. 2014. The LexA regulated genes of the *Clostridium difficile*. *BMC Microbiol* 14:88.
  - 624 10. Edwards AN, Tamayo R, McBride SM. 2016. A novel regulator controls *Clostridium*  
625 *difficile* sporulation, motility and toxin production. *Mol Microbiol* 100:954–971.
  - 626 11. Martin-Verstraete I, Peltier J, Dupuy B. 2016. The regulatory networks that control  
627 *Clostridium difficile* toxin synthesis. *Toxins (Basel)* 8:153.
  - 628 12. Bradshaw WJ, Kirby JM, Roberts AK, Shone CC, Acharya KR. 2017. The molecular  
629 structure of the glycoside hydrolase domain of Cwp19 from *Clostridium difficile*. *FEBS J*  
630 284:4343–4357.
  - 631 13. Woods EC, Nawrocki KL, Suárez JM, McBride SM. 2016. The *Clostridium difficile* Dlt  
632 pathway is controlled by the extracytoplasmic function sigma factor  $\sigma^{\text{Dlt}}$  in response to  
633 lysozyme. *Infect Immun* 84:1902–1916.
  - 634 14. Neumann-Schaal M, Metzendorf NG, Troitzsch D, Nuss AM, Hofmann JD, Beckstette M,  
635 Dersch P, Otto A, Sievers S. 2018. Tracking gene expression and oxidative damage of  
636 O<sub>2</sub>-stressed *Clostridioides difficile* by a multi-omics approach. *Anaerobe* 53:94–107.
  - 637 15. Kint N, Janoir C, Monot M, Hoys S, Soutourina O, Dupuy B, Martin-Verstraete I. 2017.  
638 The alternative sigma factor  $\sigma^{\text{B}}$  plays a crucial role in adaptive strategies of  
639 *Clostridium difficile* during gut infection. *Environ Microbiol* 19:1933–1958.
  - 640 16. Elena SF, Lenski RE. 2003. Evolution experiments with microorganisms: the dynamics  
641 and genetic bases of adaptation. *Nat Rev Genet* 4:457–469.
  - 642 17. Brooks AN, Turkarslan S, Beer KD, Yin Lo F, Baliga NS. 2011. Adaptation of cells to new  
643 environments. *Wiley Interdiscip Rev Syst Biol Med* 3:544–561.
  - 644 18. McDonald JAK, Mullish BH, Pechlivanis A, Liu Z, Brignardello J, Kao D, Holmes E, Li J V,  
645 Clarke TB, Thursz MR, others. 2018. Inhibiting growth of *Clostridioides difficile* by  
646 restoring valerate, produced by the intestinal microbiota. *Gastroenterology* 155:1495–  
647 1507.
  - 648 19. Vemuri RC, Gundamaraju R, Shinde T, Eri R. 2017. Therapeutic interventions for gut  
649 dysbiosis and related disorders in the elderly: antibiotics, probiotics or faecal microbiota  
650 transplantation? *Benef Microbes* 8:179–192.
  - 651 20. Riedel T, Bunk B, Thürmer A, Spröer C, Brzuszkiewicz E, Abt B, Gronow S, Liesegang H,

- 652 Daniel R, Overmann J. 2015. Genome resequencing of the virulent and multidrug-  
653 resistant reference strain *Clostridium difficile* 630. *Genome Announc* 3:e00276--15.
- 654 21. Monot M, Boursaux-Eude C, Thibonnier M, Vallenet D, Moszer I, Medigue C, Martin-  
655 Verstraete I, Dupuy B. 2011. Reannotation of the genome sequence of *Clostridium*  
656 *difficile* strain 630.
- 657 22. Girinathan BP, DiBenedetto N, Worley JN, Peltier J, Lavin Ri, Delaney ML, Cummins C,  
658 Onderdonk AB, Gerber GK, Dupuy B, others. 2020. The mechanisms of in vivo  
659 commensal control of *Clostridioides difficile* virulence. *bioRxiv*.
- 660 23. Bouillaut L, Self WT, Sonenshein AL. 2013. Proline-dependent regulation of *Clostridium*  
661 *difficile* Stickland metabolism. *J Bacteriol* 195:844–854.
- 662 24. Bouillaut L, Dubois T, Francis MB, Daou N, Monot M, Sorg JA, Sonenshein AL, Dupuy B.  
663 2019. Role of the global regulator Rex in control of NAD<sup>+</sup>-regeneration in *Clostridioides*  
664 (*Clostridium*) *difficile*. *Mol Microbiol* 111:1671–1688.
- 665 25. Szklarczyk D, Morris JH, Cook H, Kuhn M, Wyder S, Simonovic M, Santos A, Doncheva  
666 NT, Roth A, Bork P, others. 2016. The STRING database in 2017: quality-controlled  
667 protein–protein association networks, made broadly accessible. *Nucleic Acids Res*  
668 gkw937.
- 669 26. Reiss DJ, Plaisier CL, Wu W-J, Baliga NS. 2015. cMonkey2: Automated, systematic,  
670 integrated detection of co-regulated gene modules for any organism. *Nucleic Acids Res*  
671 43:e87.
- 672 27. Arrieta-Ortiz ML, Hafemeister C, Bate AR, Chu T, Greenfield A, Shuster B, Barry SN,  
673 Gallitto M, Liu B, Kacmarczyk T, Santoriello F, Chen J, Rodrigues CD, Sato T, Rudner  
674 DZ, Driks A, Bonneau R, Eichenberger P. 2015. An experimentally supported model of  
675 the *Bacillus subtilis* global transcriptional regulatory network. *Mol Syst Biol* 11.
- 676 28. Peterson EJR, Reiss DJ, Turkarslan S, Minch KJ, Rustad T, Plaisier CL, Longabaugh  
677 WJR, Sherman DR, Baliga NS. 2014. A high-resolution network model for global gene  
678 regulation in *Mycobacterium tuberculosis*. *Nucleic Acids Res* 42:11291–11303.
- 679 29. Brooks AN, Reiss DJ, Allard A, Wu W-J, Salvanha DM, Plaisier CL, Chandrasekaran S,  
680 Pan M, Kaur A, Baliga NS. 2014. A system-level model for the microbial regulatory  
681 genome. *Mol Syst Biol* 10:740–740.
- 682 30. Saujet L, Pereira FC, Serrano M, Soutourina O, Monot M, Shelyakin P V, Gelfand MS,  
683 Dupuy B, Henriques AO, Martin-Verstraete I. 2013. Genome-wide analysis of cell type-  
684 specific gene transcription during spore formation in *Clostridium difficile*. *PLoS Genet*  
685 9:e1003756.
- 686 31. Bonneau R, Facciotti MT, Reiss DJ, Schmid AK, Pan M, Kaur A, Thorsson V, Shannon P,  
687 Johnson MH, Bare JC, Longabaugh W, Vuthoori M, Whitehead K, Madar A, Suzuki L,  
688 Mori T, Chang D-E, Diruggiero J, Johnson CH, Hood L, Baliga NS. 2007. A predictive  
689 model for transcriptional control of physiology in a free living cell. *Cell* 131:1354–65.
- 690 32. Dineen SS, Villapakkam AC, Nordman JT, Sonenshein AL. 2007. Repression of  
691 *Clostridium difficile* toxin gene expression by CodY. *Mol Microbiol* 66:206–219.
- 692 33. Underwood S, Guan S, Vijayasubhash V, Baines SD, Graham L, Lewis RJ, Wilcox MH,  
693 Stephenson K. 2009. Characterization of the sporulation initiation pathway of *Clostridium*  
694 *difficile* and its role in toxin production. *J Bacteriol* 191:7296–7305.
- 695 34. Wolfe CJ, Kohane IS, Butte AJ. 2005. Systematic survey reveals general applicability of"  
696 guilt-by-association" within gene coexpression networks. *BMC Bioinformatics* 6:227.
- 697 35. Dembek M, Barquist L, Boinett CJ, Cain AK, Mayho M, Lawley TD, Fairweather NF,  
698 Fagan RP. 2015. High-throughput analysis of gene essentiality and sporulation in  
699 *Clostridium difficile*. *MBio* 6:e02383--14.
- 700 36. Bradshaw WJ, Bruxelle J-F, Kovacs-Simon A, Harmer NJ, Janoir C, Péchiné S, Acharya  
701 KR, Michell SL. 2019. Molecular features of lipoprotein CD0873: A potential vaccine  
702 against the human pathogen *Clostridioides difficile*. *J Biol Chem* 294:15850–15861.

- 703 37. Steglich M, Hofmann JD, Helmecke J, Sikorski J, Spröer C, Riedel T, Bunk B, Overmann  
704 J, Neumann-Schaal M, Nübel U. 2018. Convergent loss of ABC transporter genes from  
705 *Clostridioides difficile* genomes is associated with impaired tyrosine uptake and p-cresol  
706 production. *Front Microbiol* 9:901.
- 707 38. Nawrocki KL, Wetzel D, Jones JB, Woods EC, McBride SM. 2018. Ethanolamine is a  
708 valuable nutrient source that impacts *Clostridium difficile* pathogenesis. *Environ Microbiol*  
709 20:1419–1435.
- 710 39. Dingle TC, Mulvey GL, Armstrong GD. 2011. Mutagenic analysis of the *Clostridium*  
711 *difficile* flagellar proteins, FliC and FliD, and their contribution to virulence in hamsters.  
712 *Infect Immun* 79:4061–4067.
- 713 40. Lee ASY, Song KP. 2005. LuxS/autoinducer-2 quorum sensing molecule regulates  
714 transcriptional virulence gene expression in *Clostridium difficile*. *Biochem Biophys Res*  
715 *Commun* 335:659–666.
- 716 41. Kashaf SS, Angione C, Lió P. 2017. Making life difficult for *Clostridium difficile*:  
717 augmenting the pathogen’s metabolic model with transcriptomic and codon usage data  
718 for better therapeutic target characterization. *BMC Syst Biol* 11:25.
- 719 42. Larocque M, Chénard T, Najmanovich R. 2014. A curated *C. difficile* strain 630 metabolic  
720 network: prediction of essential targets and inhibitors. *BMC Syst Biol* 8:117.
- 721 43. Theriot CM, Koenigsnecht MJ, Carlson Jr PE, Hatton GE, Nelson AM, Li B, Huffnagle  
722 GB, Li JZ, Young VB. 2014. Antibiotic-induced shifts in the mouse gut microbiome and  
723 metabolome increase susceptibility to *Clostridium difficile* infection. *Nat Commun* 5:3114.
- 724 44. Janoir C, Denève C, Bouttier S, Barbut F, Hoys S, Caleechum L, Chapetón-Montes D,  
725 Pereira FC, Henriques AO, Collignon A, others. 2013. Adaptive strategies and  
726 pathogenesis of *Clostridium difficile* from in vivo transcriptomics. *Infect Immun* 81:3757–  
727 3769.
- 728 45. Karasawa T, Ikoma S, Yamakawa K, Nakamura S. 1995. A defined growth medium for  
729 *Clostridium difficile*. *Microbiology* 141:371–375.
- 730 46. Becker SA, Palsson BO. 2008. Context-specific metabolic networks are consistent with  
731 experiments. *PLoS Comput Biol* 4:e1000082.
- 732 47. Jenior ML, Leslie JL, Young VB, Schloss PD. 2017. *Clostridium difficile* colonizes  
733 alternative nutrient niches during infection across distinct murine gut microbiomes.  
734 *Msystems* 2.
- 735 48. Galperin MY, Makarova KS, Wolf YI, Koonin E V. 2015. Expanded microbial genome  
736 coverage and improved protein family annotation in the COG database. *Nucleic Acids*  
737 *Res* 43:D261–D269.
- 738 49. Consortium TU. 2017. UniProt: the universal protein knowledgebase. *Nucleic Acids Res*  
739 45:D158–D169.
- 740 50. Wattam AR, Abraham D, Dalay O, Disz TL, Driscoll T, Gabbard JL, Gillespie JJ, Gough  
741 R, Hix D, Kenyon R, others. 2014. PATRIC, the bacterial bioinformatics database and  
742 analysis resource. *Nucleic Acids Res* 42:D581–D591.
- 743 51. Gößner AS, Picardal F, Tanner RS, Drake HL. 2008. Carbon metabolism of the  
744 moderately acid-tolerant acetogen *Clostridium drakei* isolated from peat. *FEMS Microbiol*  
745 *Lett* 287:236–242.
- 746 52. Sakai S, Inokuma K, Nakashimada Y, Nishio N. 2008. Degradation of glyoxylate and  
747 glycolate with ATP synthesis by a thermophilic anaerobic bacterium, *Moorella* sp. strain  
748 HUC22-1. *Appl Environ Microbiol* 74:1447–1452.
- 749 53. Tatusova T, DiCuccio M, Badretdin A, Chetvernin V, Nawrocki EP, Zaslavsky L,  
750 Lomsadze A, Pruitt KD, Borodovsky M, Ostell J. 2016. NCBI prokaryotic genome  
751 annotation pipeline. *Nucleic Acids Res* 44:6614–6624.
- 752 54. Seemann T. 2014. Prokka: rapid prokaryotic genome annotation. *Bioinformatics*  
753 30:2068–2069.

- 754 55. Arndt D, Grant JR, Marcu A, Sajed T, Pon A, Liang Y, Wishart DS. 2016. PHASTER: a  
755 better, faster version of the PHAST phage search tool. *Nucleic Acids Res* 44:W16--W21.
- 756 56. Barrett T, Wilhite SE, Ledoux P, Evangelista C, Kim IF, Tomashevsky M, Marshall KA,  
757 Phillippy KH, Sherman PM, Holko M, others. 2012. NCBI GEO: archive for functional  
758 genomics data sets—update. *Nucleic Acids Res* 41:D991--D995.
- 759 57. Moretto M, Sonogo P, Dierckxsens N, Brilli M, Bianco L, Ledezma-Tejeida D, Gama-  
760 Castro S, Galardini M, Romualdi C, Laukens K, Collado-Vides J, Meysman P, Engelen K.  
761 2016. COLOMBOS v3.0: leveraging gene expression compendia for cross-species  
762 analyses. *Nucleic Acids Res* 44:D620-3.
- 763 58. Nguyen NTT, Contreras-Moreira B, Castro-Mondragon JA, Santana-Garcia W, Ossio R,  
764 Robles-Espinoza CD, Bahin M, Collombet S, Vincens P, Thieffry D, others. 2018. RSAT  
765 2018: regulatory sequence analysis tools 20th anniversary. *Nucleic Acids Res* 46:W209--  
766 W214.
- 767 59. Dehal PS, Joachimiak MP, Price MN, Bates JT, Baumohl JK, Chivian D, Friedland GD,  
768 Huang KH, Keller K, Novichkov PS, Dubchak IL, Alm EJ, Arkin AP. 2010.  
769 MicrobesOnline: an integrated portal for comparative and functional genomics. *Nucleic*  
770 *Acids Res* 38:D396-400.
- 771 60. Bailey TL, Johnson J, Grant CE, Noble WS. 2015. The MEME suite. *Nucleic Acids Res*  
772 43:W39--W49.
- 773 61. Kanehisa M, Furumichi M, Tanabe M, Sato Y, Morishima K. 2017. KEGG: new  
774 perspectives on genomes, pathways, diseases and drugs. *Nucleic Acids Res* 45:D353--  
775 D361.
- 776 62. Orth JD, Thiele I, Palsson BØ. 2010. What is flux balance analysis? *Nat Biotechnol*  
777 28:245--248.
- 778 63. Heirendt L, Arreckx S, Pfau T, Mendoza SN, Richelle A, Heinken A, Haraldsdóttir HS,  
779 Wachowiak J, Keating SM, Vlasov V, others. 2019. Creation and analysis of biochemical  
780 constraint-based models using the COBRA Toolbox v. 3.0. *Nat Protoc* 14:639--702.
- 781 64. Vallenet D, Calteau A, Cruveiller S, Gachet M, Lajus A, Josso A, Mercier J, Renaux A,  
782 Rollin J, Rouy Z, others. 2017. MicroScope in 2017: an expanding and evolving  
783 integrated resource for community expertise of microbial genomes. *Nucleic Acids Res*  
784 45:D517--D528.
- 785 65. Dineen SS, McBride SM, Sonenshein AL. 2010. Integration of metabolism and virulence  
786 by *Clostridium difficile* CodY. *J Bacteriol* 192:5350--5362.
- 787 66. Soutourina O, Dubois T, Monot M, Shelyakin P V, Saujet L, Boudry P, Gelfand MS,  
788 Dupuy B, Martin-Verstraete I. 2020. Genome-Wide Transcription Start Site Mapping and  
789 Promoter Assignments to a Sigma Factor in the Human Enteropathogen *Clostridioides*  
790 *difficile*. *Front Microbiol* 11:1939.
- 791 67. Antunes A, Martin-Verstraete I, Dupuy B. 2011. CcpA-mediated repression of *Clostridium*  
792 *difficile* toxin gene expression. *Mol Microbiol* 79:882--899.
- 793 68. Dubois T, Dancer-Thibonnier M, Monot M, Hamiot A, Bouillaut L, Soutourina O, Martin-  
794 Verstraete I, Dupuy B. 2016. Control of *Clostridium difficile* physiopathology in response  
795 to cysteine availability. *Infect Immun* 84:2389--2405.
- 796 69. Berges M, Michel A-M, Lassek C, Nuss AM, Beckstette M, Dersch P, Riedel K, Sievers S,  
797 Becher D, Otto A, others. 2018. Iron regulation in *Clostridioides difficile*. *Front Microbiol*  
798 9:3183.
- 799 70. El Meouche I, Peltier J, Monot M, Soutourina O, Pestel-Caron M, Dupuy B, Pons J-L.  
800 2013. Characterization of the SigD regulon of *C. difficile* and its positive control of toxin  
801 production through the regulation of *tcdR*. *PLoS One* 8.
- 802 71. Fimlaid KA, Bond JP, Schutz KC, Putnam EE, Leung JM, Lawley TD, Shen A. 2013.  
803 Global analysis of the sporulation pathway of *Clostridium difficile*. *PLoS Genet* 9.  
804

805 **FIGURES**

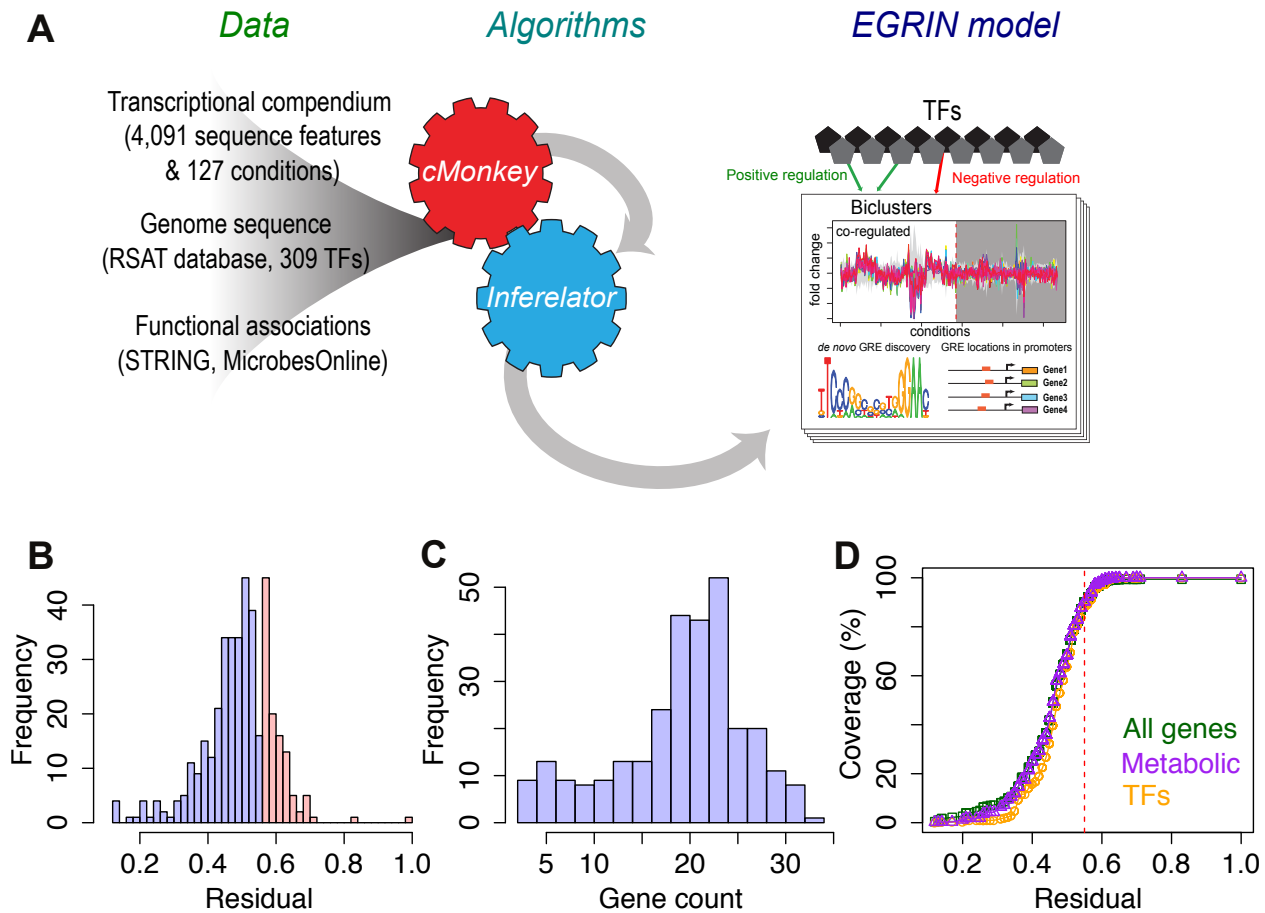

806

807 **Figure 1. Inference pipeline and general properties of the resulting Environment Gene**  
808 **Regulatory Influence Network (EGRIN) model of *C. difficile*.** (A) Framework used to build the  
809 EGRIN model. (B) Distribution of residual values for the 406 detected co-regulated gene modules.  
810 297 gene modules had residual values equal or lower than 0.55 (shown in purple) and were  
811 labelled as high quality. (C) Distribution of gene count for the high quality gene modules. (D)  
812 Coverage of all genes (4,018), the subset of metabolic genes (1,030) and TFs (309) by EGRIN  
813 modules for different residual thresholds. The red dashed line indicates the 0.55 residual cutoff.

814

815

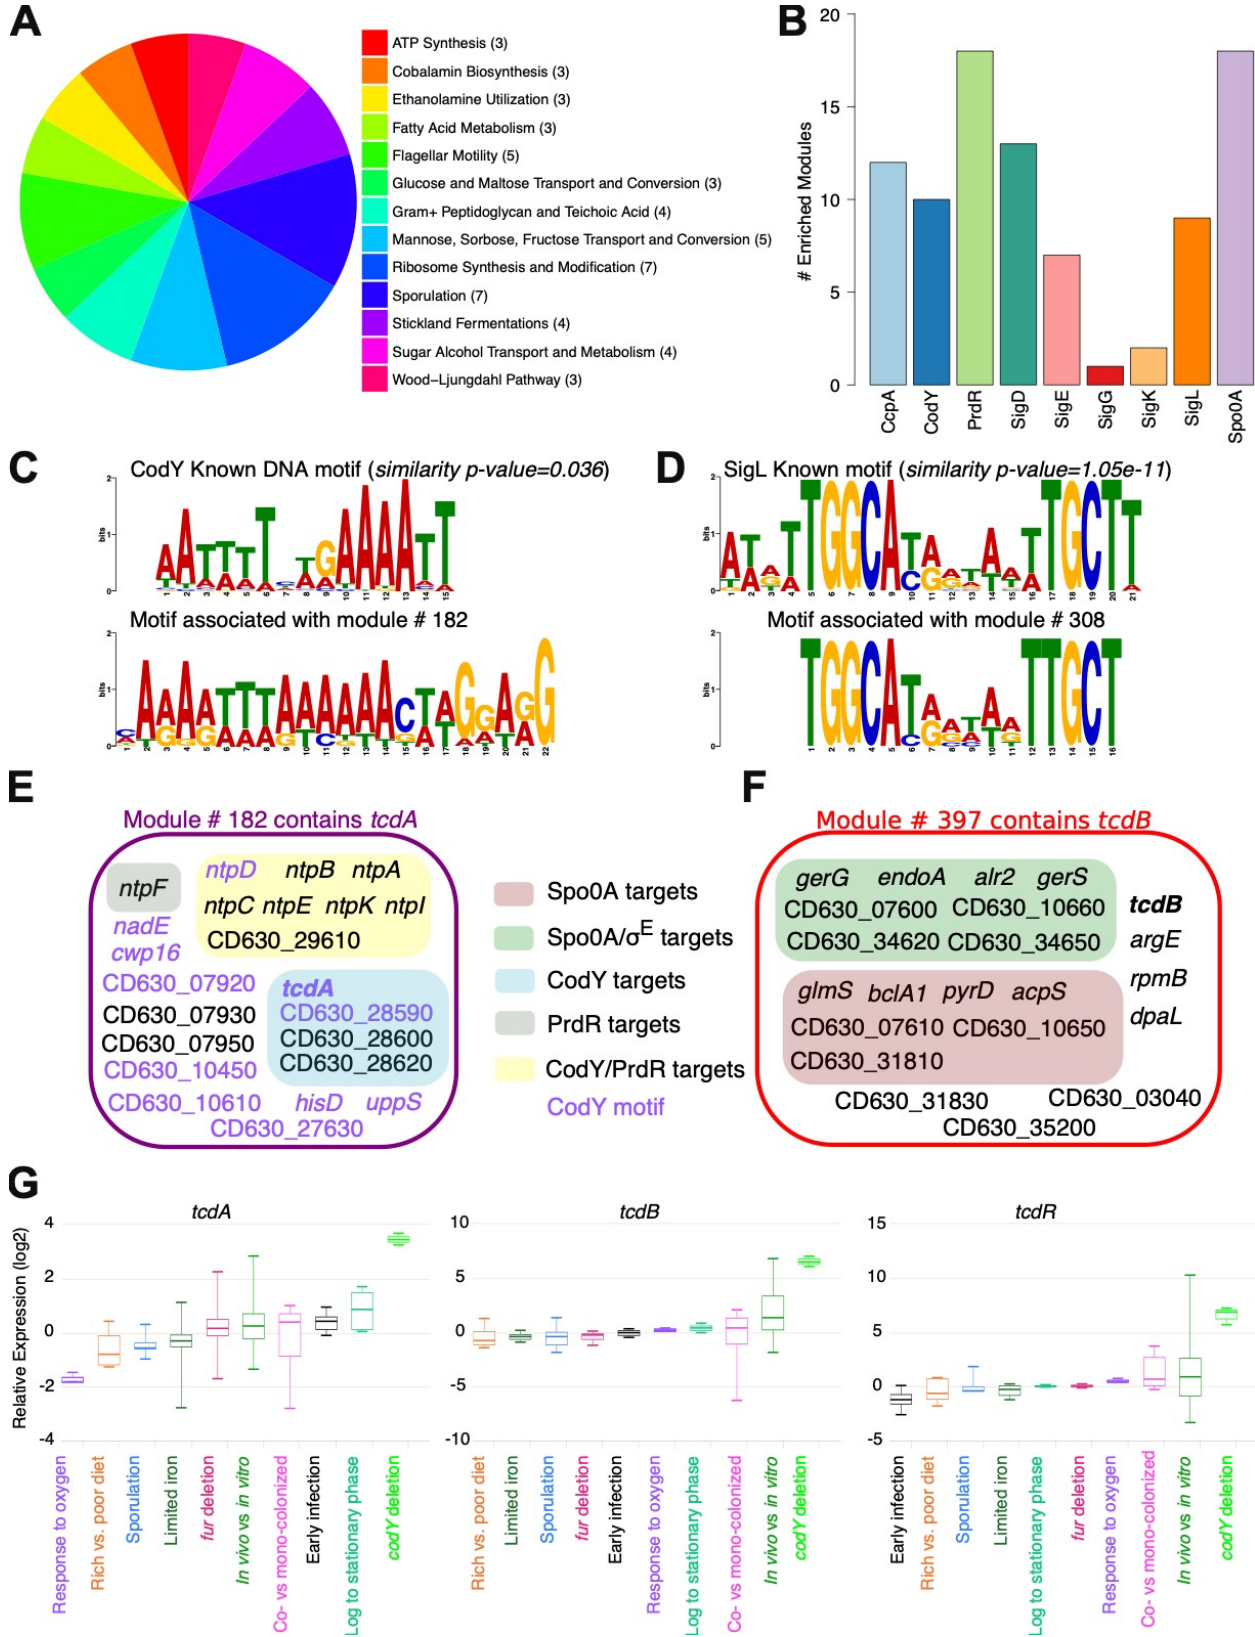

816

817 **Figure 2. The Environment Gene Regulatory Influence Network model of *C. difficile***  
818 **recapitulates known biology of the pathogen.** (A) Co-regulated gene modules are enriched  
819 with functional terms derived from expert curated annotation of the *C. difficile* genome (22). The  
820 pie chart shows terms over-represented in three or more modules. Number of modules associated  
821 with each functional term is shown in parenthesis. (B) Enriched gene modules among nine (out  
822 of 13) manually-defined and experimentally supported TF regulons (compiled from publicly  
823 available data in Table S1). (C) EGRIN identified the known DNA binding motif of CodY (65). (D)  
824 EGRIN also identified the known DNA binding motif of SigL (66). Motif comparisons were  
825 performed using Tomtom (60). (E) The EGRIN model recapitulated the previously reported  
826 influence of CodY on *tcdA* expression. The module #182 contains *tcdA*, it is enriched with  
827 members of the CodY regulon and contains a motif (shown in panel C) similar to the  
828 experimentally determined CodY motif. (F) The EGRIN model also captured the interaction  
829 between toxin expression and sporulation via module #397 that contains *tcdB* and is enriched  
830 with genes regulated by sporulation-related transcriptional regulators. (G) Expression profiles of  
831 *tcdAB* and *tcdR* (positive regulator of the pathogenicity loci). Highest expression of the toxin genes  
832 and their activator was observed in the *codY* single deletion condition (light green box).  
833



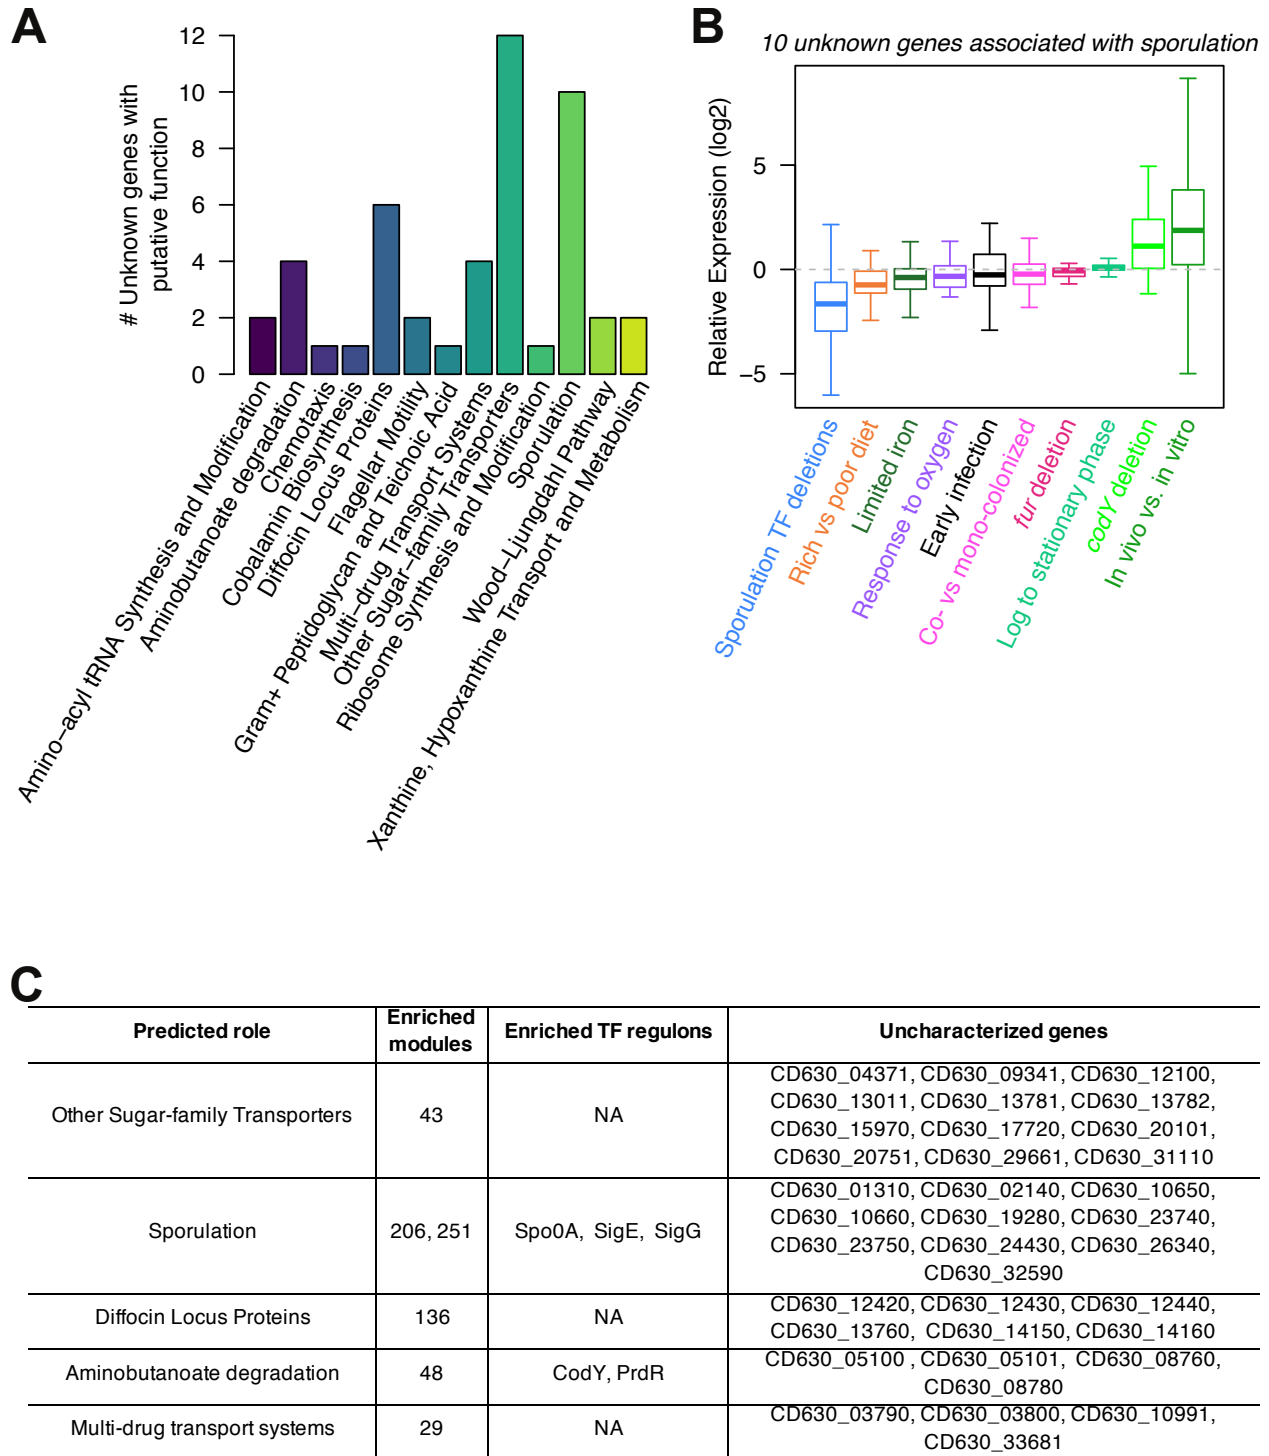

834

835

836 **Figure 3. The EGRIN model offers insights on potential functions of uncharacterized genes**

837 **of *C. difficile*.** Hypotheses regarding the functions of 48 uncharacterized genes were generated

838 based on their membership in high quality co-regulated gene modules significantly enriched with

839 specific functional terms. (A) Barplot with the number of unknown genes associated with each  
840 functional term (from the *C. difficile* genome annotation in Girinathan et al. (22) ). (B) The  
841 involvement of 10 uncharacterized genes in sporulation was supported by the observed strongest  
842 and significant down-regulation in single deletion strains of transcriptional regulators of  
843 sporulation (*spo0A*, *sigEFGK*, *spoIIID*). (C) Locus tag of uncharacterized genes associated with  
844 selected functional terms.

845

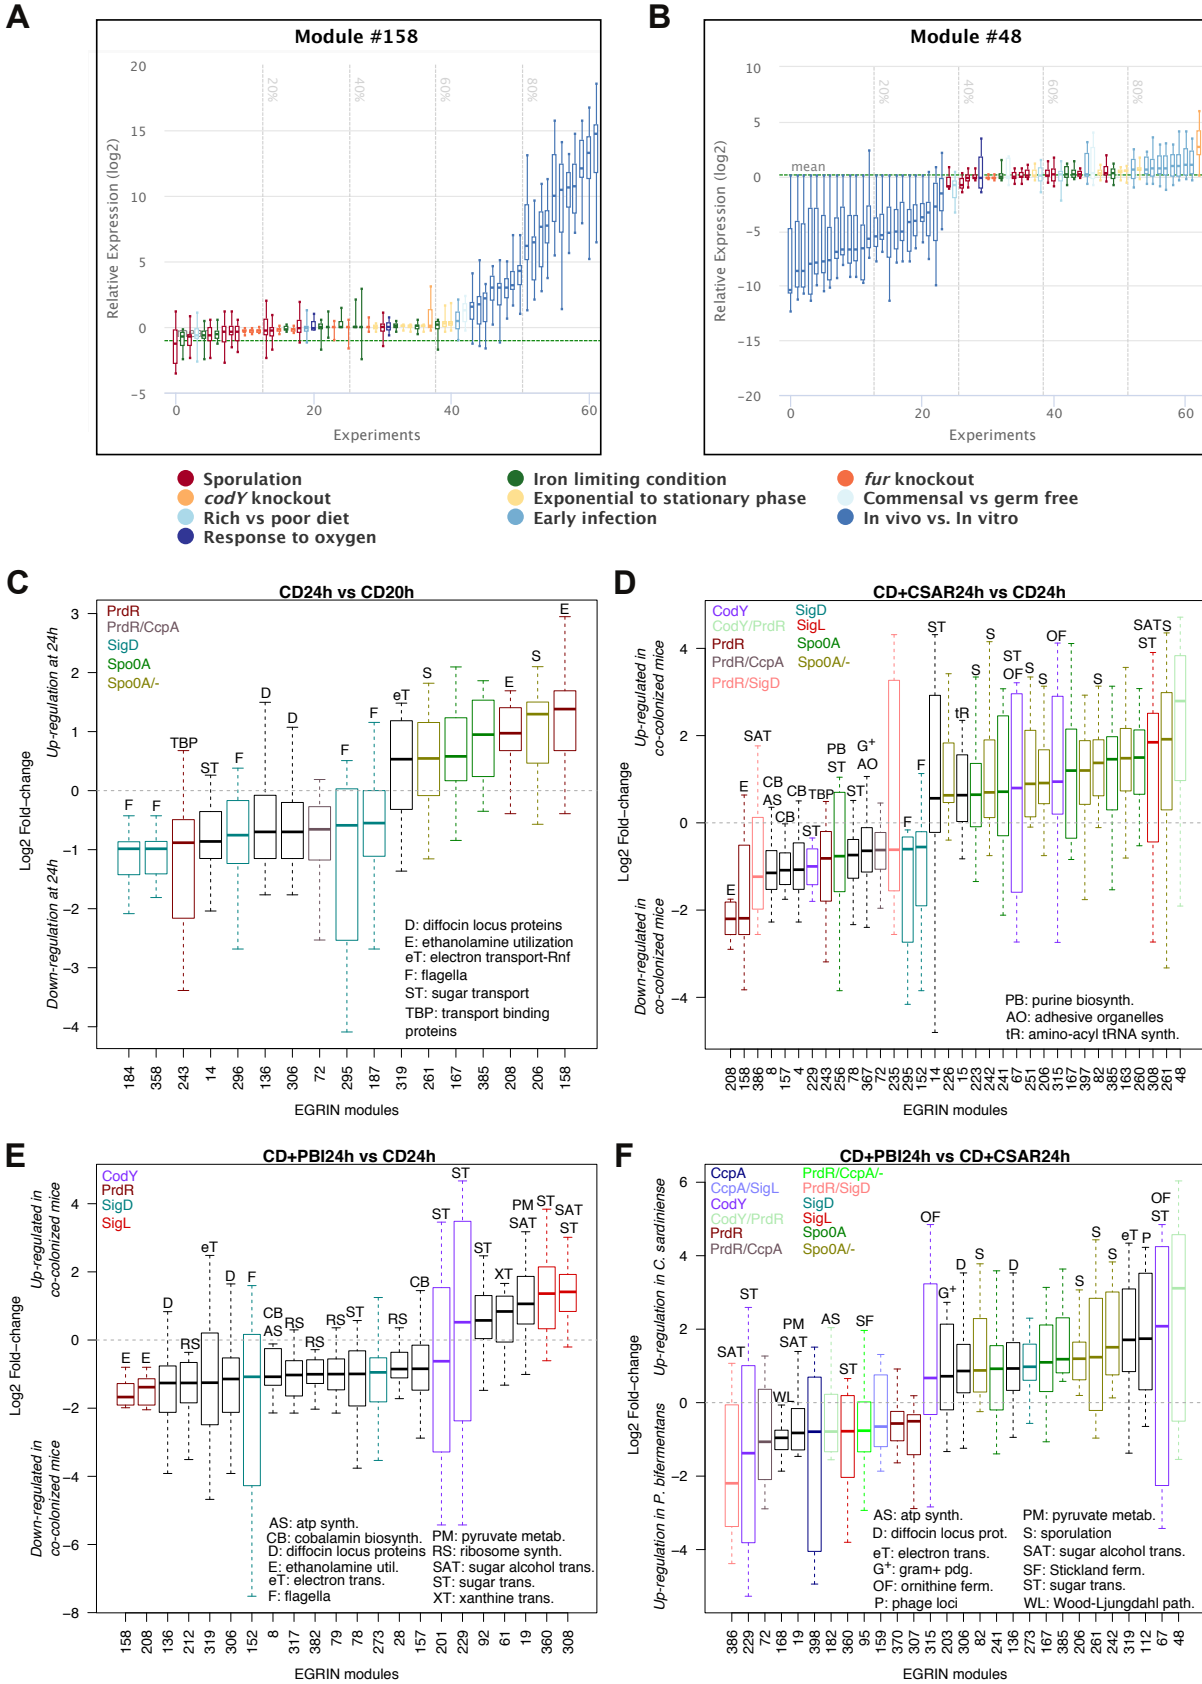

847 **Figure 4. The EGRIN model identifies TFs driving the *in vivo* response of *C. difficile* when**  
848 **interacting with gut commensals *P. bifermentans* (PBI) and *C. sardiniense* (CSAR). (A)**  
849 **Expression profile of module #158. (B) Expression profile of module #48. (C) EGRIN modules**  
850 **enriched with genes differentially expressed (absolute log<sub>2</sub> fold-change > 1 and adjusted p-value**  
851 **< 0.05) in *C. difficile* mono-colonized mice at 24 vs 20 hours of infection. X-axis shows module**  
852 **IDs. Modules were annotated according to their functional enrichment and overlap with manually**  
853 **curated TF regulons (Table S1). (D) Enriched EGRIN modules in *C. sardiniense*+*C. difficile* co-**  
854 **colonized mice vs *C. difficile* mono-colonized mice at 24 hours of infection. Due to space**  
855 **constraint, only abbreviations of functional terms not shown in other panels are displayed. (E)**  
856 **Enriched EGRIN modules in *P. bifermentans*+*C. difficile* co-colonized mice vs *C. difficile* mono-**  
857 **colonized mice at 24 hours of infection. (F) Enriched EGRIN modules in *P. bifermentans*+*C.***  
858 ***difficile* co-colonized mice vs *C. sardiniense*+*C. difficile* co-colonized mice at 24 hours of infection.**  
859 **For all comparisons, only modules with absolute median fold-changes > 0.5, and enriched with**  
860 **TF regulons or functional categories are displayed.**  
861  
862  
863

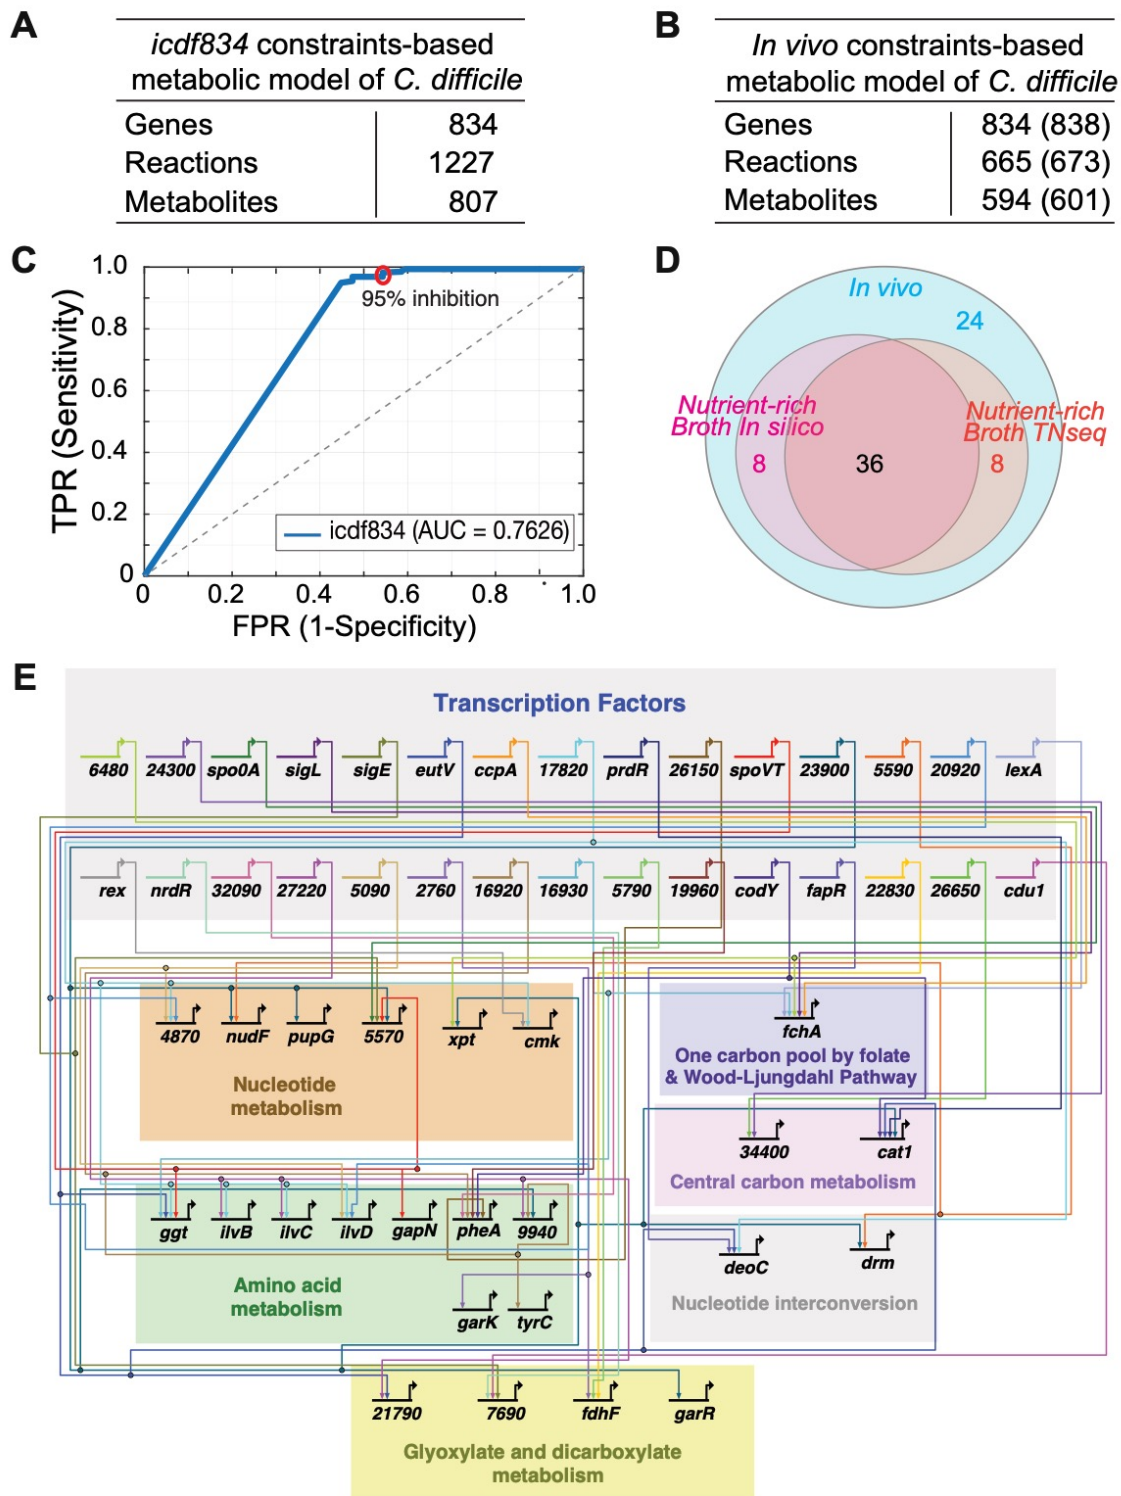

864

865 **Figure 5. Metabolic model predictions.** (A) Details of the *in vitro* metabolic model of *C. difficile*

866 630 (41). (B) Details of *icdf838* metabolic model of *C. difficile* 630. Initial *in vivo* model was derived

867 using the GIMME algorithm (46) where only the active reactions are included from *in vivo*  
868 transcriptome. The numbers in parentheses indicate the number of genes, reactions and  
869 metabolites in the icdf838 model after adding the required *in vivo* exchanges and transports. (C)  
870 ROC curve showing the accuracy of icdf834-predicted gene essentiality in nutrient rich medium  
871 evaluated against a Tn-seq functional screen (35). Red circle indicates the 95% growth inhibition  
872 as threshold. (D) Venn diagram showing the number of model-predicted essential genes for  
873 growth of *C. difficile* 630 *in vitro* vs *in vivo*. (E) BioTapestry visualization of *in vivo* gene regulatory  
874 network for *C. difficile* 630: All 24 *in vivo*-specific essential genes that are regulated by  
875 transcription factors (TFs) are shown. Transcriptional regulators are derived from EGRIN. The  
876 network includes all TFs that regulate more than four *in vivo* essential genes. The genes and TFs  
877 shown as five digit numbers represent the nomenclature preceded by 'CD630\_' (e.g. 27220  
878 indicates CD630\_27220).

879

880

A

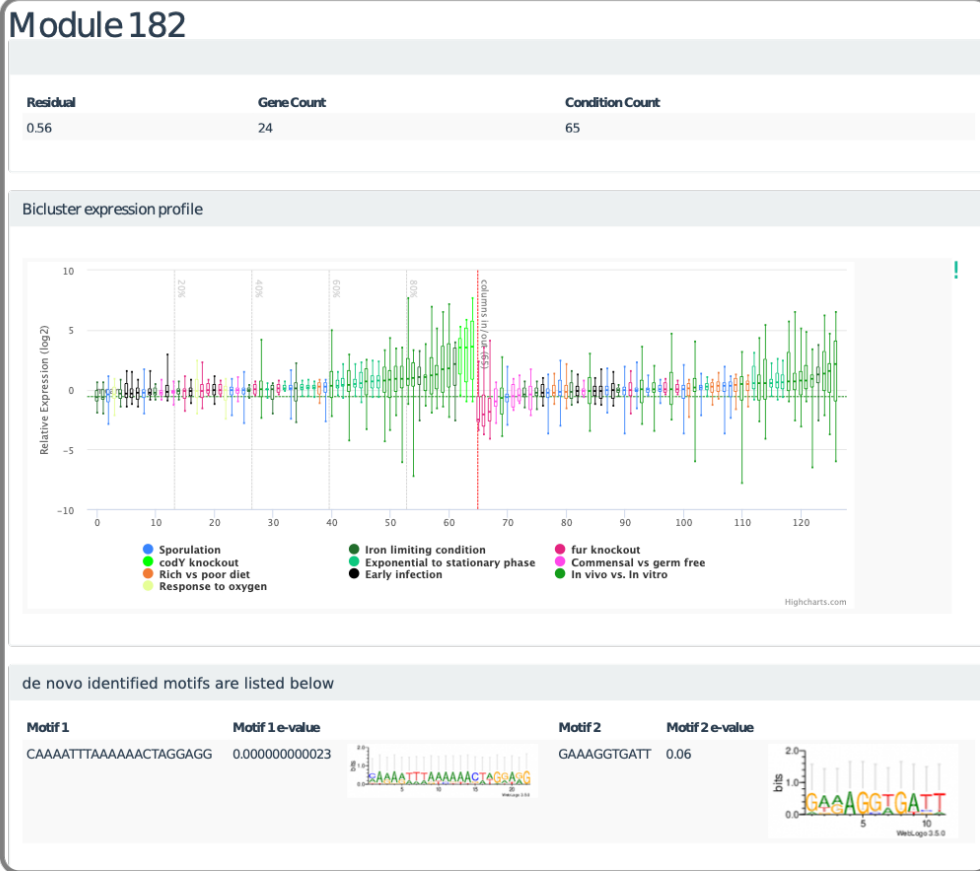

B

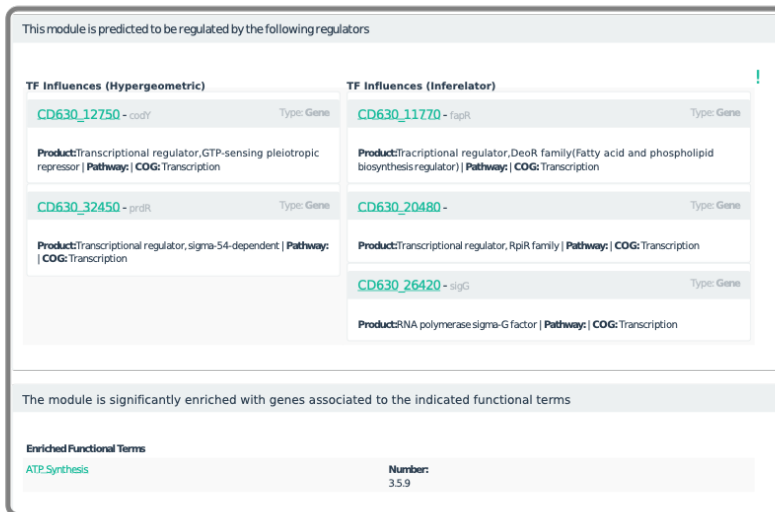

C

Genes that are included in this module

Displaying 1 - 24 of 24

| Title              | Short Name  | Product                                 | Alt Names                                      | Function                                                                                             | Essentiality |
|--------------------|-------------|-----------------------------------------|------------------------------------------------|------------------------------------------------------------------------------------------------------|--------------|
| <b>CD630_06630</b> | <i>tcdA</i> | Toxin A                                 | Toxin A (EC 2.4.1.-)                           |                                                                                                      |              |
| <b>CD630_07920</b> |             | Putative membrane protein, DUF81 family | Probable membrane transporter protein          |                                                                                                      |              |
| <b>CD630_07930</b> |             | Putative membrane protein, DUF81 family | Probable membrane transporter protein          |                                                                                                      |              |
| <b>CD630_07940</b> | <i>nadE</i> | NH3-dependent NAD(+) synthetase         | NH(3)-dependent NAD(+) synthetase (EC 6.3.1.5) | Catalyzes the ATP-dependent amidation of deamido-NAD to form NAD. Uses ammonia as a nitrogen source. | Yes          |

882 **Figure 6. An example module page of the *C. difficile* Portal.** Module #182, associated with  
883 CodY and shown in Fig 2D is used as an example. (A) Each module page includes general  
884 statistics of the module (residual score, gene count), displays the module expression profile in the  
885 compiled transcriptional compendium and the detected motifs. (B) A module page also offers  
886 information about the potential transcriptional regulators of the module. Putative regulators are  
887 defined based on over-representation of manually compiled TF regulons (assessed using  
888 hypergeometric test) and based on the Inferelator predictions. (C) Each module page includes a  
889 list of its gene members with a brief description of each gene. This information includes gene  
890 name, product, alternative names, function and essentiality. In the example, only the first four  
891 genes (out of 24) are shown. The user can click in any gene to visit the corresponding gene page.  
892  
893



894 **TABLES**

895 **Table 1. Datasets used for generating *C. difficile* transcriptional compendium**

| Condition                                                             | GEO Series Accession   | # Transcriptomes <sup>a</sup> | # Controls <sup>b</sup> |
|-----------------------------------------------------------------------|------------------------|-------------------------------|-------------------------|
| Early infections (0h, 30 mins, 60 mins, 120 mins)                     | GSE18407               | 12                            | NA <sup>c</sup>         |
| <i>In vivo</i> vs <i>in vitro</i> (8h, 14h, 38h)                      | GSE43305               | 32                            | NA <sup>c</sup>         |
| Iron limitation                                                       | GSE109453<br>GSE120189 | 15                            | 15 <sup>d</sup>         |
| <i>fur</i> deletion                                                   | GSE69218<br>GSE120189  | 12                            | 12 <sup>d</sup>         |
| Response to oxygen                                                    | GSE109175              | 3                             | 3                       |
| Response to commensals and diet                                       | GSE60751               | 8                             | 8 <sup>e</sup>          |
| Rich diet vs Poor diet                                                | GSE60751               | 8                             | 8 <sup>e</sup>          |
| Transition from exponential to stationary phase                       | GSE115054              | 16                            | NA <sup>c</sup>         |
| <i>codY</i> KO                                                        | GSE23192               | 3                             | NA <sup>c</sup>         |
| Sporulation ( <i>spo0A</i> KO, <i>sigEFGK</i> KOs, <i>spolIID</i> KO) | GSE45977<br>GSE63777   | 18                            | 6                       |

896 <sup>a</sup>Refers to the number of arrays used as numerator when estimating log2 ratios

897 <sup>b</sup>Control arrays were averaged and used as denominator when estimating log2 ratios

898 <sup>c</sup>Not Applicable. Dual channel array and therefore the control was included in each array

899 <sup>d</sup>Six samples used as controls were also considered as main transcriptome in other comparisons

900 <sup>e</sup>Samples used as controls were also considered as main transcriptome in other comparisons

901 **SUPPLEMENTARY FIGURES**

902

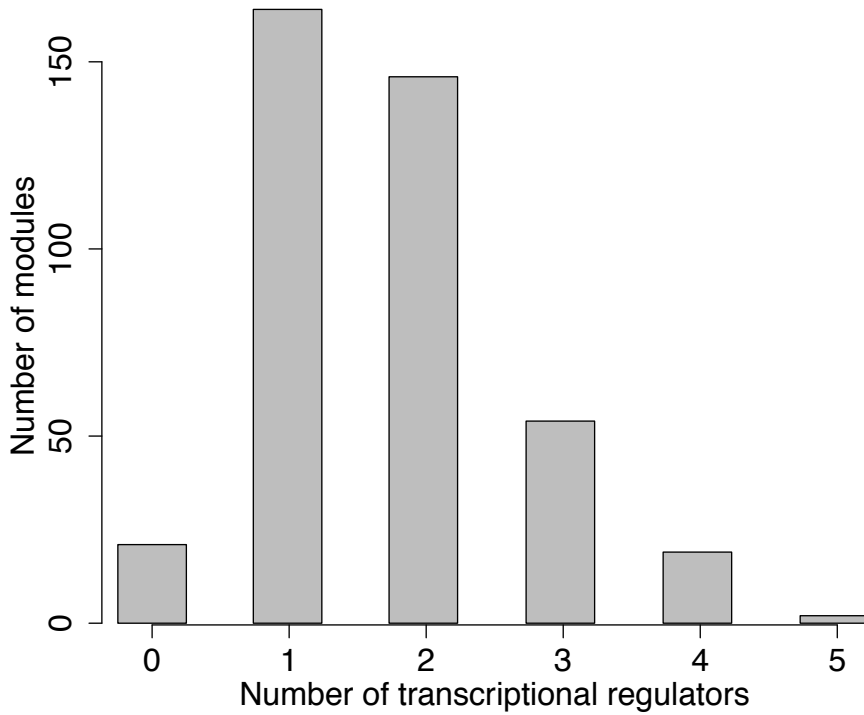

903

904 **Figure S1. Number of Inferelator-predicted transcriptional regulators of modules in the**  
905 **EGRIN model.**

906

907

908

A

C. diff Portal Home Genes Gene Regulatory Network Metabolic Network About Resources -

*Clostridioides difficile* causes >500,000 infections, >30,000 deaths, and > \$5 billion/year in US healthcare costs, and rates continue to rise. Antimicrobial therapy that ablates the commensal microbiota commonly triggers infection, allowing the pathogen to proliferate and release toxins that damage host mucosal surfaces. Resistance to commonly prescribed antibiotics occurs in >20% of patient isolates, a problem that confounds treatment and increases risks for recurrent infections. In this research program, we are building predictive and mechanistic models to define mechanisms by which *C. difficile* responds to antibiotics, host and microbiota-origin factors, and to develop therapeutic interventions to prevent colonization, infection and recurrence of *C. difficile*.

Genes Regulatory Modules Metabolic Reactions

Search

Enter your search term e.g. "CD630\_11990", "spoIIIAH", "CD630\_20320", "ArgB", "Acetylglutamate kinase", "G0:0003755" etc.  
Put quotes around phrases to match all the words: "fatty acid". You can require or exclude terms using + and -

Count

Genes (4,018) Metabolic Reactions (1,227) Regulatory Modules (406)

miscRNA (17)  
plasmid (21)  
sRNA (270)

Metabolic Genes (1,030)  
TF (309)  
sRNA (87)  
rRNA (32)  
Unknown function (1,330)  
Others (1,230)

B

### CD630\_06630 *tcdA*

| Title       | Product | Short Name | Synonyms | Start  | End    | Strand | Sequence Name | Essentiality |
|-------------|---------|------------|----------|--------|--------|--------|---------------|--------------|
| CD630_06630 | Toxin A | tcdA       |          | 795843 | 803975 | +      | Chromosome    |              |

[Additional annotations](#)

#### Expression profile of the gene across conditions

Relative Expression (log2)

0 1 2 3 4 5 6 7 8 9

Highcharts.com

CD630\_06630 *tcdA* is a member of the following modules

| Module | Expression Plot | Gene Count | Motif 1 e-value | Motif 1 logo | Motif 2 e-value | Motif 2 logo | Residual |
|--------|-----------------|------------|-----------------|--------------|-----------------|--------------|----------|
| 182    |                 | 24         | 0.000000000023  |              | 0.06            |              | 0.56     |
| 264    |                 | 21         | 1.9e-16         |              |                 |              | 0.71     |

910 **Figure S2. The Cdiff Web Portal.** (A) Home page of the Cdiff Portal. Users can explore the  
911 gene regulatory network model and the metabolic model for *C. difficile*. In addition, all files are  
912 accessible in the resource tab. The search bar facilitates website exploration. (B) An example  
913 gene page of the *C. difficile* Portal.  
914  
915

916 **SUPPLEMENTARY TABLES**

917

918 **Table S1. Compiled TF regulons**

| Regulator | Regulon Size     | Supporting Data                                                     | Reference |
|-----------|------------------|---------------------------------------------------------------------|-----------|
| CcpA      | 194 <sup>a</sup> | Protein-DNA binding, transcriptomics, <i>in silico</i> <sup>b</sup> | (3, 67)   |
| CodY      | 160 <sup>c</sup> | Protein-DNA binding, transcriptomics                                | (65)      |
| Fur       | 19               | Transcriptomics, <i>in silico</i> <sup>b</sup>                      | (68, 69)  |
| PrdR      | 181              | Transcriptomics                                                     | (24)      |
| SigB      | 57               | Transcriptomics                                                     | (15)      |
| SigD      | 159              | Transcriptomics                                                     | (70)      |
| SigE      | 96               | Transcriptomics                                                     | (30)      |
| SigF      | 25               |                                                                     |           |
| SigG      | 46               |                                                                     |           |
| SigH      | 40               | Transcriptomics, <i>in silico</i> <sup>b</sup>                      | (4)       |
| SigK      | 54               | Transcriptomics                                                     | (30)      |
| SigL      | 46 <sup>d</sup>  | Transcriptomics, <i>in silico</i> <sup>b</sup>                      | (66)      |
| Spo0A     | 276 <sup>e</sup> | Transcriptomics                                                     | (71)      |

919 <sup>a</sup>Only genes classified as CcpA-dependent (in the presence or absence of glucose) by Antunes  
920 et al. 2012 (3) were included

921 <sup>b</sup>*In silico* search of the binding motif of the corresponding regulator within the genes and their  
922 promoter sequences

923 <sup>c</sup>Only genes negatively influenced by CodY were included

924 <sup>d</sup>Only genes with SigL motif and down-regulated in *sigL* deletion were included

925 <sup>e</sup>Only genes positively influenced by Spo0A were included

926

927

928 **Table S2. General properties of modules associated with the pathogenicity loci**

| Gene        | Locus tag | Module <sup>a</sup> | Residual | Functional enrichment <sup>b</sup> | Enriched TF regulons <sup>b</sup> | Inferelator predicted regulators <sup>b</sup> |
|-------------|-----------|---------------------|----------|------------------------------------|-----------------------------------|-----------------------------------------------|
| <i>tcdR</i> | CD_06590  | 31                  | 0.46     | NF                                 | NF                                | SigG, SpoVT                                   |
|             |           | 336                 | 0.54     | NF                                 | NF                                | FapR, CD_16930                                |
| <i>tcdB</i> | CD_06600  | 284                 | 0.63     | NF                                 | NF                                | CD_06930, CD_17820                            |
|             |           | 397                 | 0.49     | NF                                 | Spo0A, SigE                       | SpoVT, CD_06290                               |
| <i>tcdE</i> | CD_06610  | 31                  | 0.46     | NF                                 | NF                                | SigG, SpoVT                                   |
|             |           | 138                 | 0.61     | NF                                 | NF                                | CD_06290, CD_12390, SpoVT                     |
| <i>tcdA</i> | CD_06630  | 182                 | 0.56     | ATP synthesis                      | CodY, PrdR                        | FapR, CD_20480, SigG                          |
|             |           | 264                 | 0.71     | NF                                 | NF                                | SigV                                          |
| <i>tcdC</i> | CD_06640  | 146                 | 0.52     | NF                                 | NF                                | CD_27320, PhoU                                |
|             |           | 395                 | 0.51     | NF                                 | NF                                | CD_18100, CD_35440                            |

929 <sup>a</sup>Modules that contain the corresponding member of the pathogenicity loci

930 <sup>b</sup>Refers to the information shown for the corresponding module on the Cdiff Web Portal

931

932 **Table S3. Model predicted essential genes *in vivo***

| Locus tag   | Gene name  | Gene product/function                                 | Pathway                                         | In silico predictions |                                     | Expt                                         |
|-------------|------------|-------------------------------------------------------|-------------------------------------------------|-----------------------|-------------------------------------|----------------------------------------------|
|             |            |                                                       |                                                 | Essentiality in vivo  | Essentiality nutrient-rich in vitro | Essentiality Nutrient-rich in vitro (Tn-seq) |
| CD630_09940 | G12WB-1109 | serine-pyruvate aminotransferase                      | Alanine, aspartate and glutamate metabolism     | Essential             | Non-Essential                       | Non-Essential                                |
| CD630_05800 | gapN       | glyceraldehyde-3-phosphate dehydrogenase              | Valine, leucine and isoleucine metabolism       | Essential             | Non-Essential                       | Non-Essential                                |
| CD630_15340 | ggt        | gamma-glutamyltranspeptidase                          | Alanine, aspartate and glutamate metabolism     | Essential             | Non-Essential                       | Non-Essential                                |
| CD630_23430 | cat1       | succinyl-CoA:coenzyme A transferase                   | Butanoate fermentation; Methionine Biosynthesis | Essential             | Non-Essential                       | Non-Essential                                |
| CD630_34400 | G12WB-3619 | glycoside hydrolase-type carbohydrate-binding protein | Glycolysis                                      | Essential             | Non-Essential                       | Non-Essential                                |
| CD630_30840 | garK       | glycerate kinase                                      | Glycine, serine and threonine metabolism        | Essential             | Non-Essential                       | Non-Essential                                |
| CD630_28130 | garR       | tartronate semialdehyde reductase                     | Glyoxylate and dicarboxylate metabolism         | Essential             | Non-Essential                       | Non-Essential                                |
| CD630_33170 | fdhF       | formate dehydrogenase-H                               | Glyoxylate and dicarboxylate metabolism         | Essential             | Non-Essential                       | Non-Essential                                |
| CD630_21790 | G12WB-2336 | anaerobic dehydrogenase                               | Glyoxylate and dicarboxylate metabolism         | Essential             | Non-Essential                       | Non-Essential                                |
| CD630_07690 | G12WB-880  | oxidoreductase subunit                                | Glyoxylate and dicarboxylate metabolism         | Essential             | Non-Essential                       | Non-Essential                                |

|             |           |                                                       |                                                     |           |               |               |
|-------------|-----------|-------------------------------------------------------|-----------------------------------------------------|-----------|---------------|---------------|
| CD630_12240 | pupG      | purine nucleoside phosphorylase                       | Purine metabolism                                   | Essential | Non-Essential | Non-Essential |
| CD630_07190 | fchA      | methenyltetrahydrofolate cyclohydrolase               | One carbon pool by folate; Wood-Ljungdahl pathway   | Essential | Non-Essential | Non-Essential |
| CD630_15660 | ilvB      | acetolactate synthase large subunit                   | Valine, leucine and isoleucine metabolism           | Essential | Non-Essential | Non-Essential |
| CD630_12230 | drm       | phosphopentomutase                                    | Nucleotide interconversion                          | Essential | Non-Essential | Non-Essential |
| CD630_20140 | ilvD      | dihydroxy-acid dehydratase                            | Valine, leucine and isoleucine metabolism           | Essential | Non-Essential | Non-Essential |
| CD630_15020 | deoC      | deoxyribose-phosphate aldolase                        | Nucleotide interconversion                          | Essential | Non-Essential | Non-Essential |
| CD630_18390 | tyrC      | prephenate dehydrogenase                              | Phenylalanine, tyrosine and tryptophan biosynthesis | Essential | Non-Essential | Non-Essential |
| CD630_18360 | pheA      | bifunctional chorismate mutase/prephenate dehydratase | Phenylalanine, tyrosine and tryptophan biosynthesis | Essential | Non-Essential | Non-Essential |
| CD630_12200 | nudF      | NUDIX family hydrolase                                | Purine metabolism                                   | Essential | Non-Essential | Non-Essential |
| CD630_23300 | xpt       | xanthine phosphoribosyltransferase                    | Purine metabolism                                   | Essential | Non-Essential | Non-Essential |
| CD630_05570 | G12WB-669 | uridine kinase                                        | Pyrimidine metabolism                               | Essential | Non-Essential | Non-Essential |
| CD630_04870 | G12WB-599 | carbon-nitrogen hydrolase                             | Pyrimidine metabolism                               | Essential | Non-Essential | Non-Essential |
| CD630_18160 | cmk       | cytidylate kinase                                     | Pyrimidine metabolism                               | Essential | Non-Essential | Non-Essential |



|             |      |                             |                                           |           |               |               |
|-------------|------|-----------------------------|-------------------------------------------|-----------|---------------|---------------|
| CD630_15650 | ilvC | ketol-acid reductoisomerase | Valine, leucine and isoleucine metabolism | Essential | Non-Essential | Non-Essential |
|-------------|------|-----------------------------|-------------------------------------------|-----------|---------------|---------------|

933

934

935

936

937

938

939

940

941

942

943

944

945

946
